# Supplementary material for: Multi-seasonal measurements of the ground-level atmospheric ice-nucleating particle abundance on the North Slope of Alaska
Source: Copernicus journal article supplement (doi:10.5194/ar-2025-1), 2025-01-24
Supplement: Supplementary file 1 [file ar-2025-1-supplement.pdf]

*Supplement of*

**Multi-seasonal measurements of the ground-level atmospheric ice-nucleating particle abundance in the North Slope of Alaska**

5 **Aidan D. Pantoya et al.**

*Correspondence to: Naruki Hiranuma (nhiranuma@wtamu.edu)*

The copyright of individual parts of the supplement might differ from the article license

## TABLE OF CONTENTS

|    | Section | Subject                                                 | Page |
|----|---------|---------------------------------------------------------|------|
|    | S1      | Inlet Loss Test                                         | 2    |
|    | S2      | Statistical Error in PINE-03                            | 4    |
| 15 | S3      | Effective Aerosol Scattering Efficiency                 | 6    |
|    | S4      | Seasonal $n_{\text{INP}}(T)$ and $n_s(T)$ Histograms    | 8    |
|    | S5      | All Data-based $n_{\text{INP}}(T)$ and $n_s(T)$ Spectra | 9    |
|    | S6      | Seasonal $n_s$ Parameterizations                        | 10   |
|    | S7      | Seasonal Backtrajectories                               | 11   |
| 20 |         | References                                              | 22   |

## S1 INLET LOSS TEST

The particle loss test for the inlet used for PINE-03 during the ExINP-NSA campaign was conducted at the BRW-NSA on October 22<sup>nd</sup>, 2021. On this day, aerosol concentration was stable with a daily mean  $\pm$  standard error of  $83.66 \pm 3.91 \text{ cm}^{-3}$  based on the 6-hour time averaged CPC counts. A calm mean wind speed of  $1.40 \pm 0.18 \text{ m s}^{-1}$  consistently from the northwest direction (300.68  $\pm$  3.12°) was observed with a moderate temperature in fall ( $-1.97 \pm 0.19 \text{ }^\circ\text{C}$ ). A total of only 0.001 inches of precipitation was measured during the test period (21:35 – 23:50 UTC).

Figure S1 (a) shows an experimental schematic of the test. The loss of particles in the inlet used at the BRW site (presumably due to gravitational settling and diffusion loss) was quantified using an optical particle sizer, OPS (model 3330, TSI Inc.). Briefly, we moved an OPS back and forth between the downstream position of the inlet inside the building and the roof of the building to examine the difference in particle size distributions in ambient air vs. air through the inlet and characterize the associated particle loss through the inlet. The inlet was composed of a PVC stack, stainless steel sampling pickup inlets (3/4 inch outer diameter) connected to a vertical sampling stack (4-inch diameter, 12 m height above ground level). A 3/8-inch conductive tube bridged the pickup port to the suite of instruments in the observatory. Total flow down the PVC stack was set to  $\approx 260 \text{ LPM}$  during the entire study period and we sub-sampled from the center of the stack.

The OPC measurements were made for 30 minutes each inside the observatory downstream of the stack inlet and at the top of the 12 m height laminar stack inlet without a rainhat. Figure S1 (b) shows the particle distribution measured inside the observatory (through the sampling line, red and green) and at the top of the inlet (in ambient air, blue). The difference between a set of inside-outside and outside-inside measurements normalized to the average OPC counts for individual OPC bin sizes was used to compute the particle loss rate as a function of optical particle diameter. As shown in Fig. S1 (c), the aerosol particle diameters corresponding to the 50% particle loss through the stack inlet from the ExINP-NSA campaign was 2.3  $\mu\text{m}$  in optical diameter. This size is slightly smaller than the 50% particle loss of the PINE-03 chamber (i.e., 4  $\mu\text{m}$  in aerodynamic diameter) under the spherical assumption. Thus, our INP measurement was limited to this particle loss size.

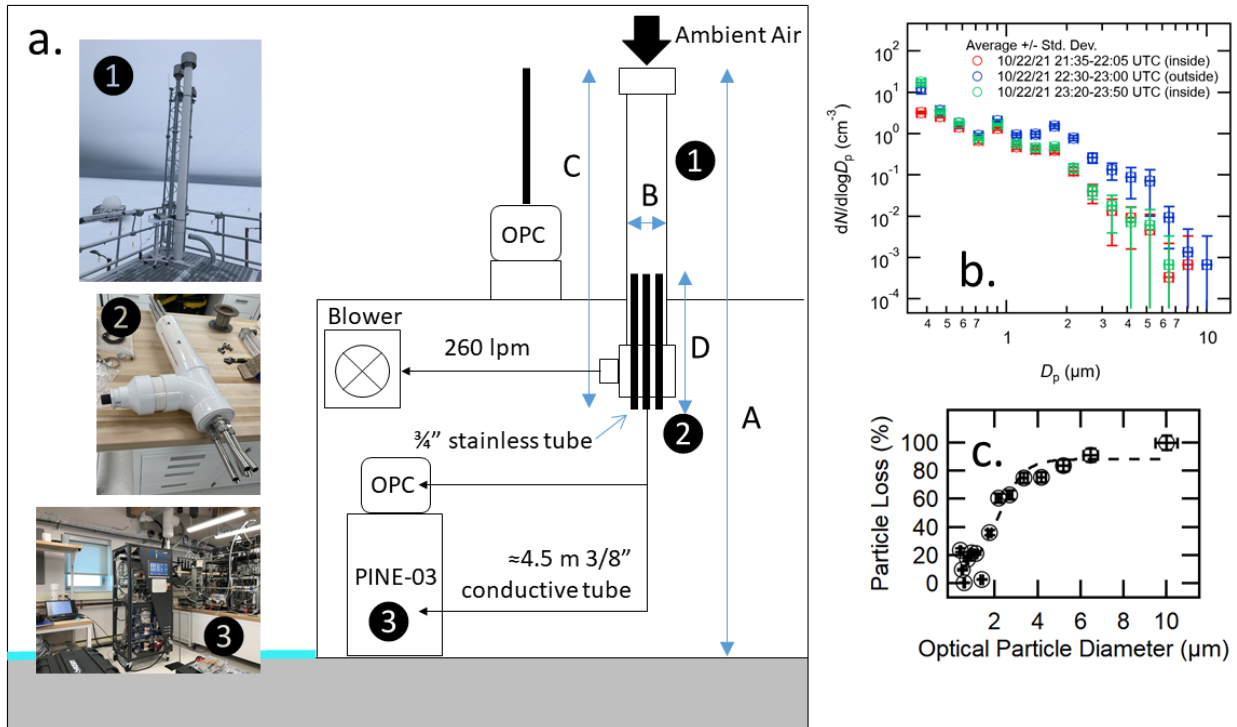

50 Figure S1: Panel (a) shows an experimental schematic of the particle loss test through the PVC stack inlet at the BRW site (A = 12 m; B = 0.1 m; C = 7.6 m; D = 0.9 m). Panels (b) and (c) show the particle size distributions measured inside and outside the observatory and particle loss through the inlet as a function of particle diameter. Each data point is shown  $\pm$  a 5% size uncertainty on the x-axis and  $\pm$  the standard deviation of three measurements on the y-axis (20-second time average for each data point).

## 55 S2 STATISTICAL ERRORS IN PINE-03

The statistical uncertainties in  $n_{\text{INP}}$  measured by PINE-03 were estimated for the selected freezing temperatures of  $\approx -11^\circ\text{C}$ ,  $-16^\circ\text{C}$ ,  $-21^\circ\text{C}$ ,  $-26^\circ\text{C}$ , and  $-31^\circ\text{C}$ . The measurements for this error analysis were performed at the BRW site from May 14 to March 23, 2024 (operation ID between 1485 and 1506). To determine the uncertainty in  $n_{\text{INP}}$  at each temperature, two types of measurements utilizing filtered and ambient air were conducted to measure the average amount of ice crystals in filtered air ( $\hat{\lambda}_f = \frac{N_f}{t_f}$ ) and that in ambient air ( $\hat{\lambda}_a = \frac{N_a}{t_a}$ ), respectively, and the relative error was calculated following the method described by previous studies (e.g., Krishnamoorthy and Lee, 2013; Moore, 2020; and Wilbourn et al. 2024). In each set of 10 runs (represented by a subscript  $f$  or  $a$ ), the cumulative number of ice crystals counted by the OPC ( $N$ ) was scaled to the number of expansions ( $t$ ). Each expansion was performed with a flushing time of 600 seconds, and filtered and ambient air runs were alternated after each run and paired for a reasonable comparison. The ambient data at a given temperature is only considered valid if it is statistically different from the background filtered air. To determine this validity, a moment-based Z statistic ( $Z_m$ ) was calculated and compared with a 90% confidence interval, using  $\alpha$  of 0.2 and  $Z_{1-\alpha/2}$  of 1.96 (the ambient data is valid if  $Z_m > Z_{1-\alpha/2}$ ; otherwise, invalid). By following Krishnamoorthy and Lee (2013), the  $Z_m$  values were computed for examined temperatures:

$$Z_m = \frac{\hat{\lambda}_a - \hat{\lambda}_f}{\sqrt{\hat{\lambda} \left( \frac{1}{t_a} + \frac{1}{t_f} \right)}} \quad [\text{S1}]$$

where

$$\hat{\lambda} = \frac{N_a + N_f}{t_a + t_f} \quad [\text{S2}]$$

75 and the Poisson mean  $\pm$  confidence interval ( $CI$ ) can be calculated as follows:

$$\hat{\lambda}_a - \hat{\lambda}_f + \frac{z_{1-\frac{\alpha}{2}}^2}{2} * \left( \frac{1}{t_a} - \frac{1}{t_f} \right) \pm z_{1-\frac{\alpha}{2}} * \sqrt{\left( \frac{\hat{\lambda}_a}{t_a} + \frac{\hat{\lambda}_f}{t_f} \right) + \frac{z_{1-\frac{\alpha}{2}}^2}{4} * \left( \frac{1}{t_a} - \frac{1}{t_f} \right)^2} \quad [\text{S3}]$$

The Poisson error was calculated for the relative size of  $CI$  to  $Mean$  in % at each tested temperature. Table S1 summarizes the results. While the estimated statistical error can exceed the systematic error in  $n_{\text{INP}}$  ( $\pm 20\%$ ) reported by Möhler et al. (2021), our error values suggest that  $n_{\text{INP}}$

80 measured by PINE-03 at ENA is statistically valid for temperatures below  $-16\text{ }^{\circ}\text{C}$  for the given  
 CIs (i.e.,  $Z_m > 1.96$ ).

85 **Table S1: PINE-03 Poisson mean and error in  $n_{\text{INP}}$  ( $\text{L}^{-1}$ ) during times when PINE-03 was measuring the INP concentration,  $n_{\text{INP}}$ , in filtered air and unfiltered (ambient) air at the BRW site. The measurements of flush periods, 600 seconds, which is our standard flushing time in daily operations, were examined. The number of expansions used for each calculation is reported as  $t_f$  and  $t_a$  for filtered and ambient air, respectively. If the measured error is statistically invalid, the mean  $\pm$  confidence interval is reported as “n/a”.**

| Temperature<br>( $^{\circ}\text{C}$ ) | Flush<br>Time (s) | $\hat{\lambda}_f$ | $t_s$ | $\hat{\lambda}_a$ | $t_a$ | Mean  | CI   | $Z_m$ |
|---------------------------------------|-------------------|-------------------|-------|-------------------|-------|-------|------|-------|
| -11                                   | 600               | 0.00              | 10    | 0.28              | 10    | 0.28  | 0.33 | 1.66  |
| -16                                   | 600               | 0.00              | 10    | 0.47              | 10    | 0.47  | 0.42 | 2.16  |
| -21                                   | 600               | 0.08              | 10    | 0.71              | 10    | 0.63  | 0.55 | 2.23  |
| -26                                   | 600               | 0.00              | 10    | 2.13              | 10    | 2.13  | 0.91 | 4.62  |
| -31                                   | 600               | 0.28              | 10    | 12.80             | 10    | 12.52 | 2.24 | 10.94 |

### S3 EFFECTIVE AEROSOL SCATTERING EFFICIENCY

90 Here we discuss the method to estimate an effective aerosol scattering efficiency ( $Q_{\text{eff}}$ ) that is representative of the BRW clean air sector during this study. The clean air sector at BRW is assumed to be dominated by marine aerosol. Here we utilize data from El Arenosillo, Spain during clean marine conditions to estimate a representative  $Q_{\text{eff}}$  value. At El Arenosillo clean marine conditions are identified when the following aerosol characteristics are met: scattering Ångström  
95 exponent ( $< 1$ ), single scattering albedo ( $> 0.92$ ), absorption coefficient ( $< 3 \text{ Mm}^{-1}$ ), and scattering coefficient ( $< 30 \text{ Mm}^{-1}$ ).

El Arenosillo data were used because their observations include sub-micron particle number size distribution (from a scanning mobility particle spectrometer (SMPS, model 3938, TSI Inc.), coarse mode particle number size distribution (from an aerosol particle sizer (APS, model  
100 3321, TSI Inc.), and measured aerosol scattering coefficient ( $\sigma_{\text{sp}}$ ) at two sizes (less than  $1 \mu\text{m}$  ( $\sigma_{\text{sp,meas},1}$ ) and less than  $10 \mu\text{m}$  ( $\sigma_{\text{sp,meas},10}$ )) from an integrating nephelometer (model 3563, TSI Inc.), enabling determination of coarse mode scattering ( $\sigma_{\text{sp,meas,coarse}} = \sigma_{\text{sp,meas},10} - \sigma_{\text{sp,meas},1}$ ).

The  $Q_{\text{eff}}$  value is estimated by the following three steps:

(1) Assess quality of the El Arenosillo size distribution data using number concentration ( $N_{\text{tot}}$ ) and  
105 scattering coefficient ( $\sigma_{\text{sp}}$ ) closure tests. For the number closure test we find that  $N_{\text{tot,cpc}}$  measured by a condensation particle counter (model 3010, TSI Inc.) is equivalent to the integrated  $N_{\text{tot,smps}}$  calculated from scanning mobility particle sizer (model 3936, TSI Inc., Sorribas et al., 2011) measurements:

$$N_{\text{tot,smps}} = \sum dN_i d\log(d_i) \quad [\text{S1}]$$

110 where  $d_i$  is the diameter of size bin  $i$  and  $N_i$  is the number of particles in size bin  $i$ .

For the scattering closure test we used using Mie theory to show that  $\sigma_{\text{sp,meas},1}$  is equivalent to  $\sigma_{\text{sp,calc},1}$  calculated from the SMPS particle number size distribution and that  $\sigma_{\text{sp,meas,coarse}}$  was consistent with scattering calculated from the APS aerosol size distribution:

$$\sigma_{\text{sp,calc}} = \sum (\pi/4) Q_i d_i^2 N_i \quad [\text{S2}]$$

115 where  $Q_i$  is the particle scattering efficiency for a particle of diameter  $d_i$ .  $Q_i$  was calculated for the nephelometer wavelengths (450, 550 and 700 nm) and assuming a refractive index of  $1.50i0.01$ . These closure tests demonstrated consistency amongst the three independent aerosol measurements and indicate the data are of high quality and can be used to estimate  $Q_{\text{eff}}$ .

120 (2) Calculate surface area, A, from measured aerosol size distribution (from SMPS or APS) using:

$$A = \sum \pi d_i^2 N_i \quad [S3]$$

(3) Calculate  $Q_{\text{eff}}$  using:

$$Q_{\text{eff}} = 4\sigma_{\text{sp,calc}} / A \quad [S4]$$

125 Table S2 shows the resulting coarse mode  $Q_{\text{eff}}$  data for each month. As seen in the table, marine coarse mode  $Q_{\text{eff}}$  values are slightly lower than for all data. Moreover, marine coarse mode  $Q_{\text{eff}}$  is less variable (less of a seasonal cycle) for marine conditions. Thus, the monthly averaged coarse mode  $Q_{\text{eff}}$  value of 2.37 ( $\pm 0.04$  standard deviation) from El Arenosillo, Spain, is considered to be a representative  $Q_{\text{eff}}$  for clean marine conditions and is used in this study. This  $Q_{\text{eff}}$  value falls  
 130 in the range of previously reported  $Q_{\text{eff}}$  values for submicron particles (1.08 - 3.0) and is also similar to  $Q_{\text{eff}}$  values for coarse particles estimated in predominantly marine conditions (i.e.,  $Q_{\text{eff}} = 2.27$  from Testa et al., 2021 and  $Q_{\text{eff}} = 2.0$  from DeMott et al., 2016).

135 **Table S2: Monthly and annual effective coarse mode  $Q_{\text{eff}}$  for all conditions and for clean marine conditions from El Arenosillo, Spain.**

| Condition               | Jan  | Feb  | Mar  | Apr  | May | Jun  | Jul  | Aug  | Sep  | Oct  | Nov  | Dec  | Average |
|-------------------------|------|------|------|------|-----|------|------|------|------|------|------|------|---------|
| $Q_{\text{eff all}}$    | 2.68 | 2.62 | 2.38 | 2.34 | 2.4 | 2.46 | 2.45 | 2.33 | 2.45 | 2.49 | 2.56 | 2.55 | 2.48    |
| $Q_{\text{eff marine}}$ | 2.38 | 2.35 | 2.38 | 2.39 | 2.3 | 2.43 | 2.42 | 2.41 | 2.41 | 2.3  | 2.37 | 2.33 | 2.37    |



## S4 SEASONAL $n_{\text{INP}}(T)$ AND $n_s(T)$ HISTOGRAMS

The seasonal breakdowns of the  $n_{\text{INP}}(T)$  and  $n_s(T)$  histograms are shown in Figs. S2 and S3, respectively. The clean subset data are used to generate these plots.

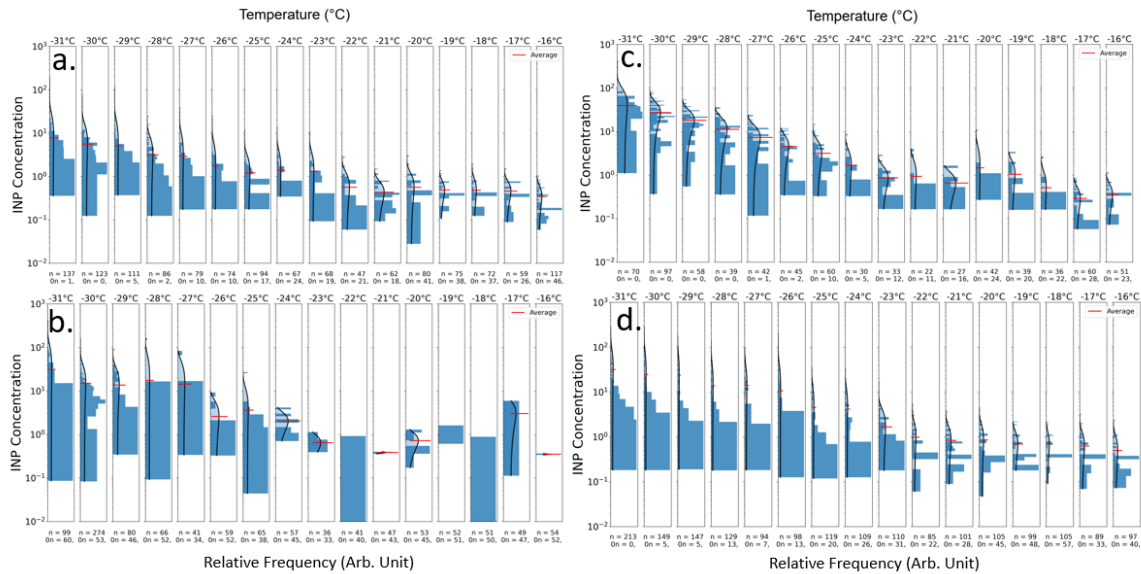

140

Figure S2. Histogram of the seasonally resolved  $m_{\text{INP}}(T)$  Gaussian distribution with a degree temperature bin for a statistically validated freezing temperature range ( $-16$  to  $-31$  °C). Panels (a) – (d) are seasonal breakdowns of the clean fall, winter, spring, and summer, respectively. Individual data densities, zero INP counts, and relative frequencies (Arbitrary Unit) for each degree are shown at the bottom of each panel. Red horizontal lines in each relative frequency distribution sub-panel represent the average. Figure 6a in the main manuscript represents the overall data.

145

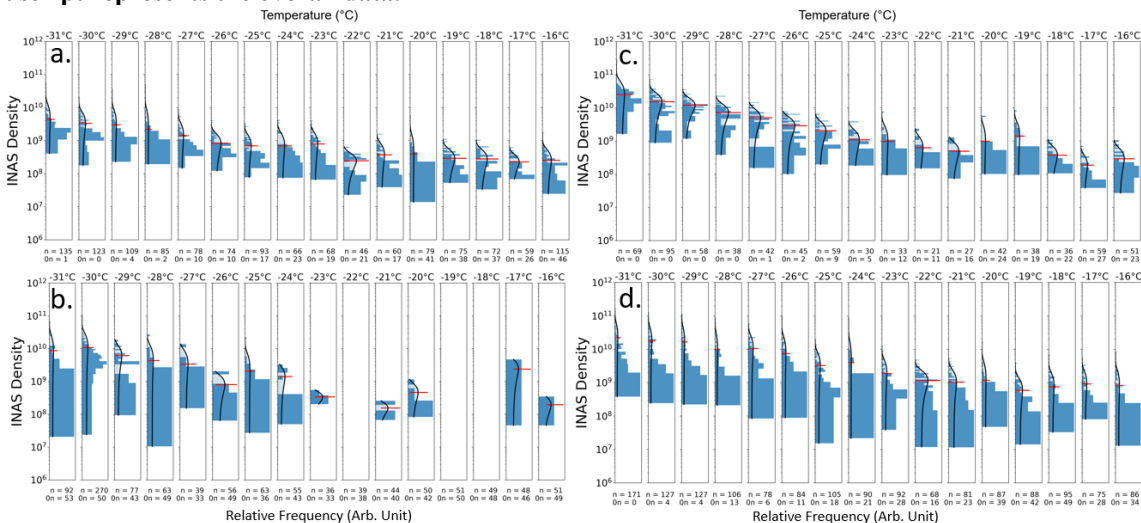

150

Figure S3. Histogram of the seasonally resolved  $n_s(T)$  Gaussian distribution with a degree temperature bin for a statistically validated freezing temperature range ( $-16$  to  $-31$  °C). Panels (a) – (d) are seasonal breakdowns of the ‘clean’ fall, winter, spring, and summer, respectively. Individual data densities, zero INP counts, and relative frequencies (Arbitrary Unit) for each degree are shown at the bottom of each panel. Red horizontal lines in each relative frequency distribution sub-panel represent the average. Figure 6b in the main manuscript represents the overall data.

## S5 ALL DATA-BASED $n_{\text{INP}}(T)$ AND $n_s(T)$ SPECTRA

155 Figure S4 shows the 6-hour averaged PINE-03-measured  $n_{\text{INP}}(T)$  and  $n_s(T)$  spectra as a function of freezing temperatures (1 °C resolution) as box plots (a – b) and seasonal spectra (c – d) based on the all-inclusive data.

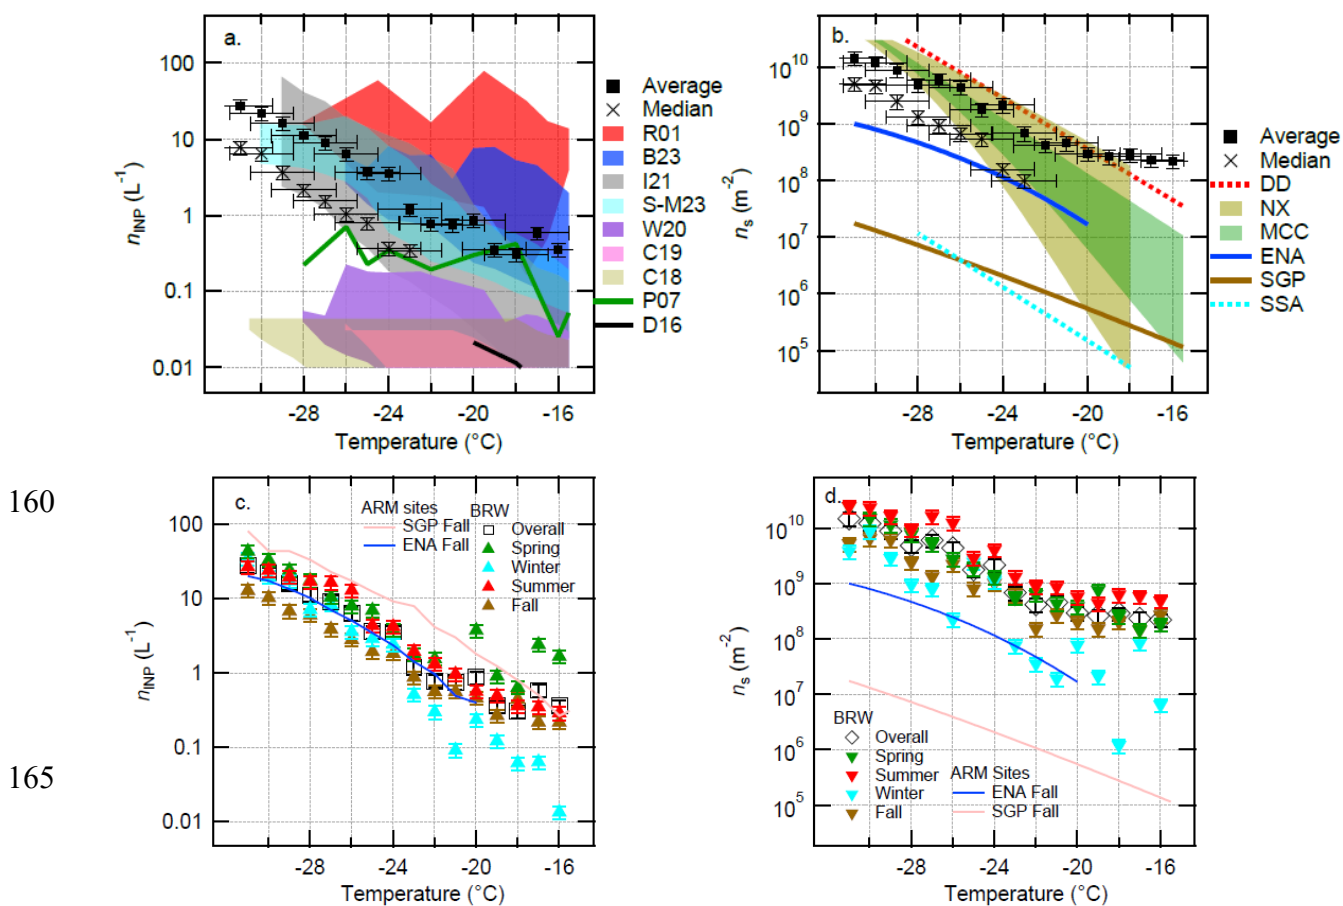

170 **Figure S4.** Box plot of the PINE-03 based  $n_{\text{INP}}(T)$  and  $n_s(T)$  spectra with a degree temperature bin for a statistically validated freezing temperature range at BRW (a – b; –16 to –31 °C). The ‘all’ data were used to generate this figure. Individual data points display average (black solid symbol) and median (black open symbol) in Panel a. The color-shaded area in panel (a) shows the maximum and minimum  $n_{\text{INP}}(T)$  measured by previous INP studies at or in the proximity of BRW (see Table A1 and Sect. 1 for references). The reference  $n_s(T)$  spectra in panels (b) are adopted from W24 (Wilbourn et al., 2024 and references therein) for SGP, ENA, Desert Dust, Sea Spray Aerosol, illite NX, and microcrystalline cellulose. Panels (c) and (d) are seasonal breakdowns of the average data presented in Panels a and b, respectively. The vertical bars are adopted from W24. Note: the temperature uncertainty of PINE-03 is  $\pm 1.5$  °C.

175

## S6 SEASONAL $n_s$ PARAMETERIZATIONS

180 Figure 8b in the main manuscript shows the  $n_s(T)$  spectra for each season based on NOAA's screened (clean) data. Following Li et al. (2022) and Wilbourn et al. (2024), we computed seasonal  $n_s(T)$  parameterizations that fit the average values of the log-normal  $n_s(T)$  distribution as a function of freezing temperatures. The resulting fit curves and equations for each season are presented in Fig. S5.

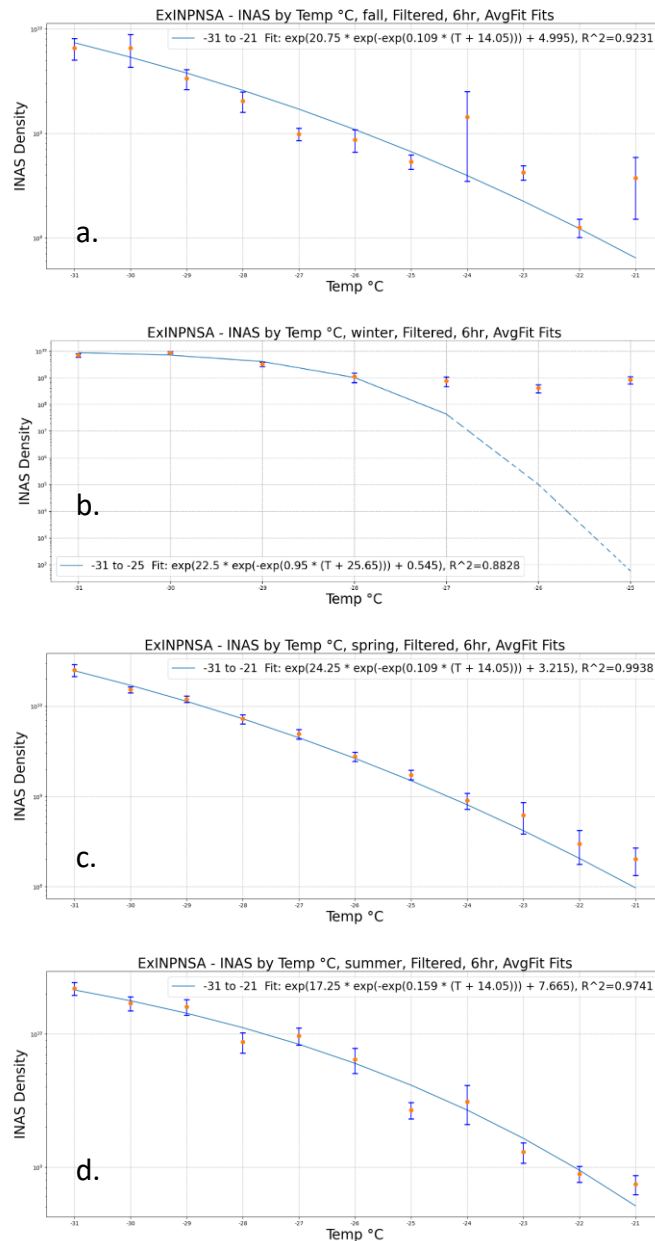

185 **Figure S5. Seasonal  $n_s(T)$  parameterizations that fit the median values of the log-normal  $n_s(T)$  distribution as a function of freezing temperatures based on the clean data; fall (a), winter (b), spring (c), and summer (d).**

## S7 SEASONAL BACK TRAJECTORIES

190 The details of high- and low-INP episodes presented in Fig. 9 in the main manuscript are shown in Figs. S6 and S7. Figures S8 and S9 display the seasonality of back trajectories and sources of air masses for all  $T_s$  and any  $T_s$  cases, respectively (see Sect. 3E for the case description). List of high- and low-INP periods from BRW for subsets of ‘all’ data is provided in Table S3

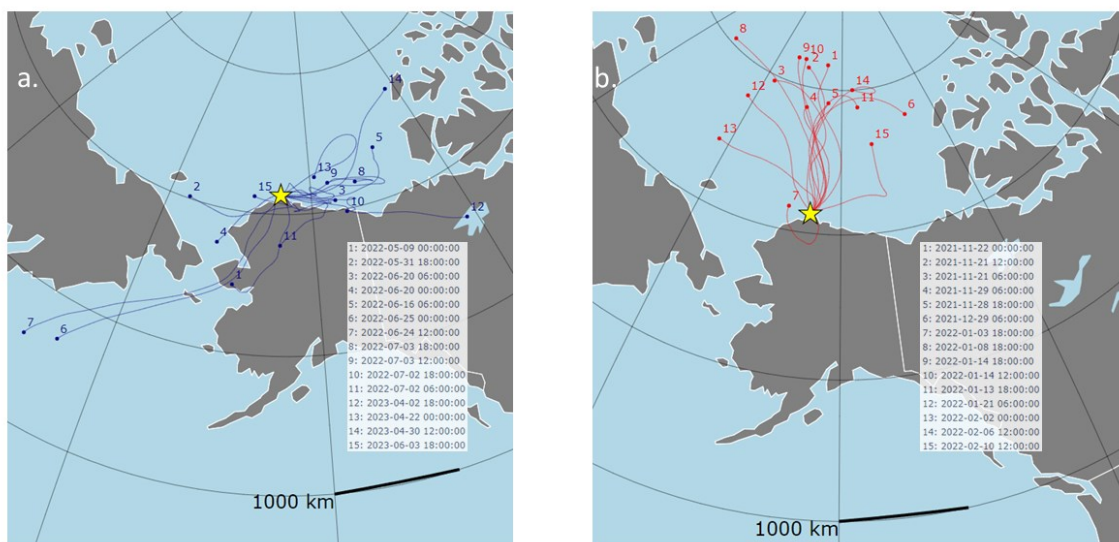

195 **Figure S6.** Air mass origins and back trajectories at the inlet height from BRW (yellow star). The air mass trajectories during high- and low-INP episodes are shown in blue and red colors. Panel (a) represents the data selected with a low – high threshold of the 25<sup>th</sup> – 75<sup>th</sup> percentile based on  $n_s$ , at all  $-30$ ,  $-25$ , and  $-20$  °C (below or above at ‘all’ temps). Panel (b) represents the data selected with a low – high INP threshold of the 25<sup>th</sup> – 75<sup>th</sup> percentile based on  $n_s(T)$  at all selected temperatures.

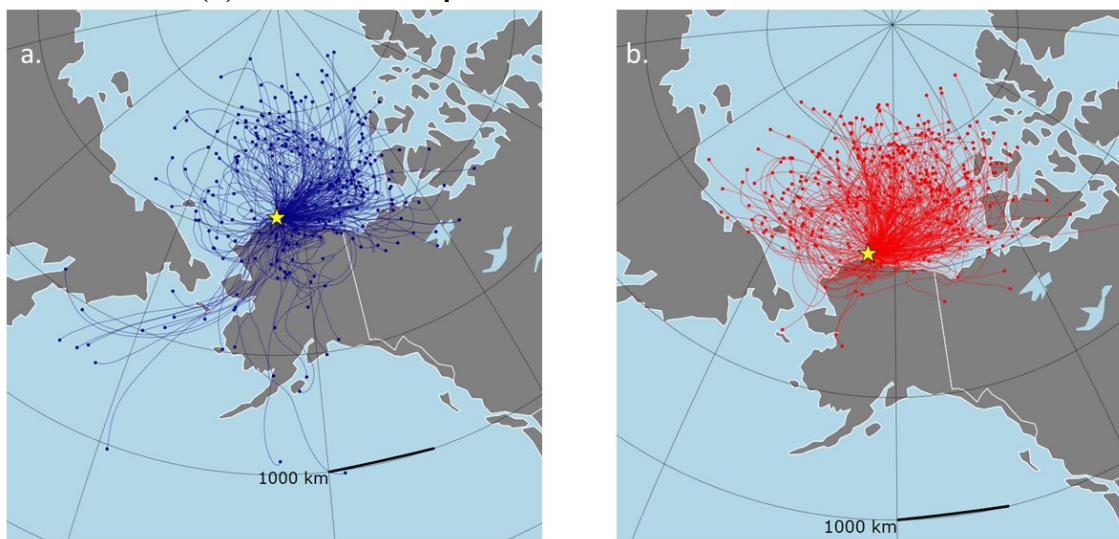

200 **Figure S7.** Air mass origins and back trajectories at the inlet height from BRW (yellow star). The air mass trajectories during high- and low-INP episodes are shown in blue and red colors. Panel (a) represents the data selected with a low – high threshold of the 25<sup>th</sup> – 75<sup>th</sup> percentile based on  $n_s$ , at any  $-30$ ,  $-25$ , and  $-20$  °C (below or above at ‘any’ temps). Panel (b) represents the data selected with a low – high INP threshold of the 25<sup>th</sup> – 75<sup>th</sup> percentile based on  $n_s(T)$  at any selected temperatures.

205

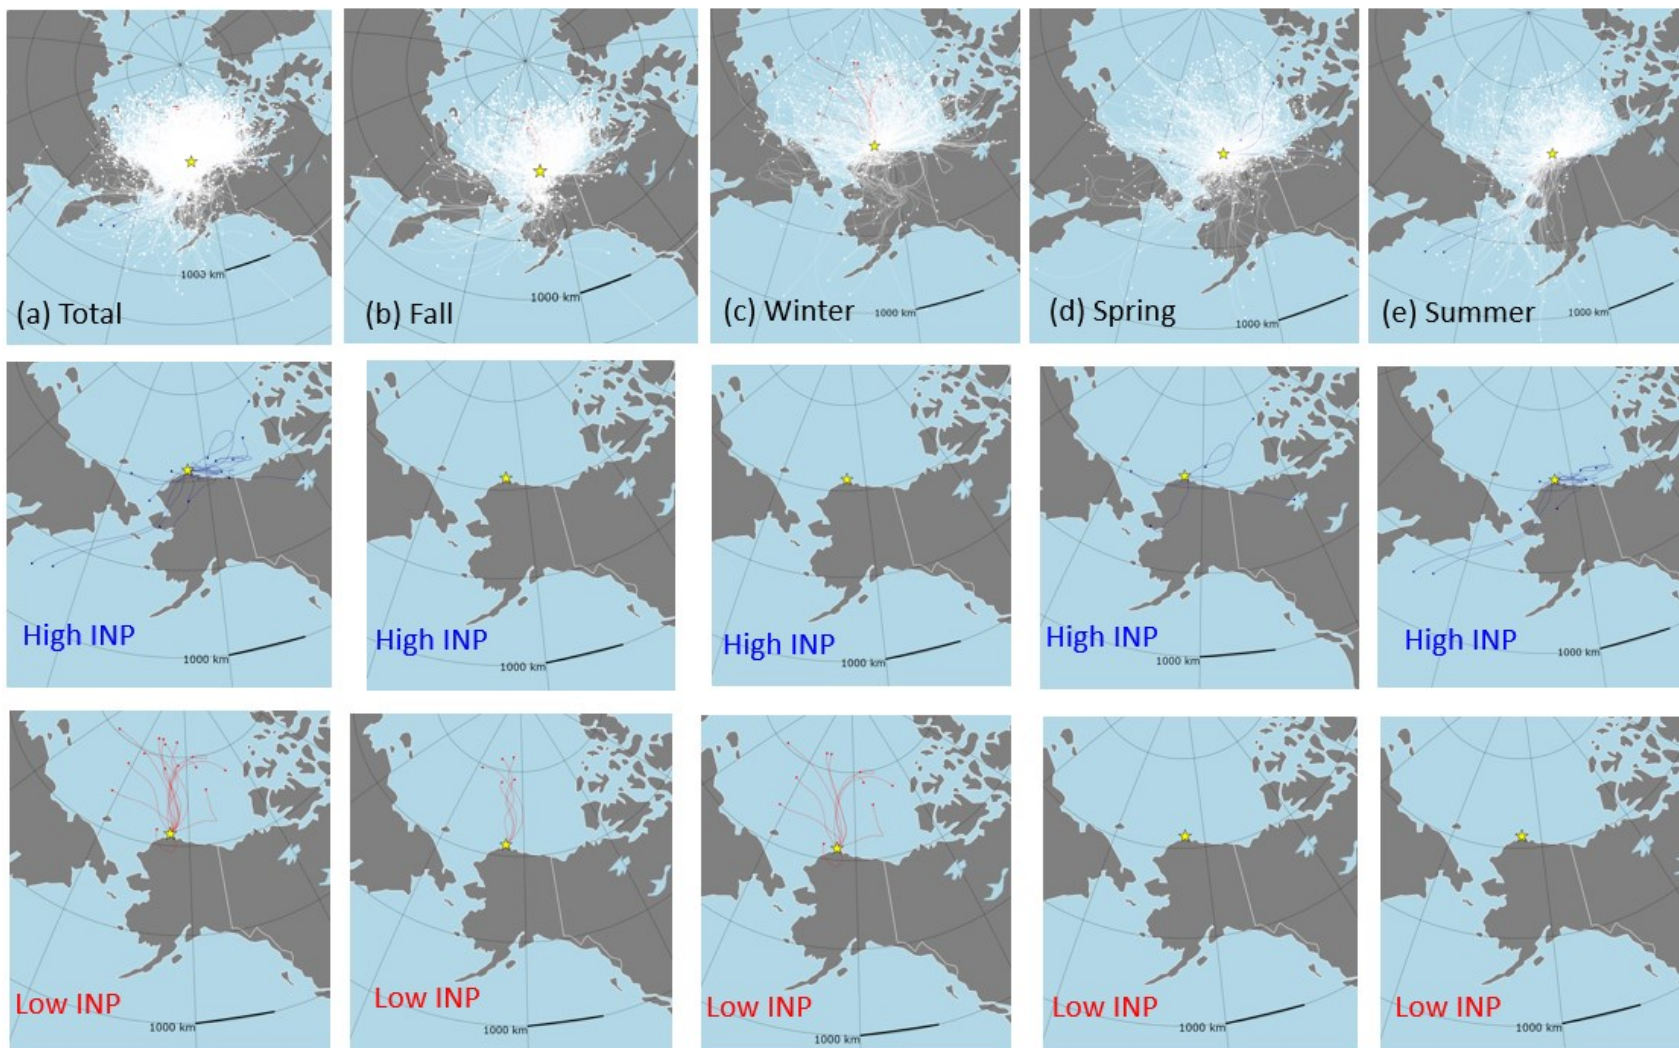

Figure S8. Air mass origins and back trajectories at the inlet height from BRW; all trajectories in October 2021 – December 2023. The air mass trajectories during high- and low-INP episodes are shown in blue and red colors. This figure represents the data selected with a low – high threshold of the 25<sup>th</sup> – 75<sup>th</sup> percentile based on  $n_s$ , at  $-30$ ,  $-25$ , and  $-20$  °C (below or above at ‘all’ temps). Figure S8a represents the overall data. Panels (b) – (e) are seasonal breakdowns of the ‘clean’ fall, winter, spring, and summer, respectively.

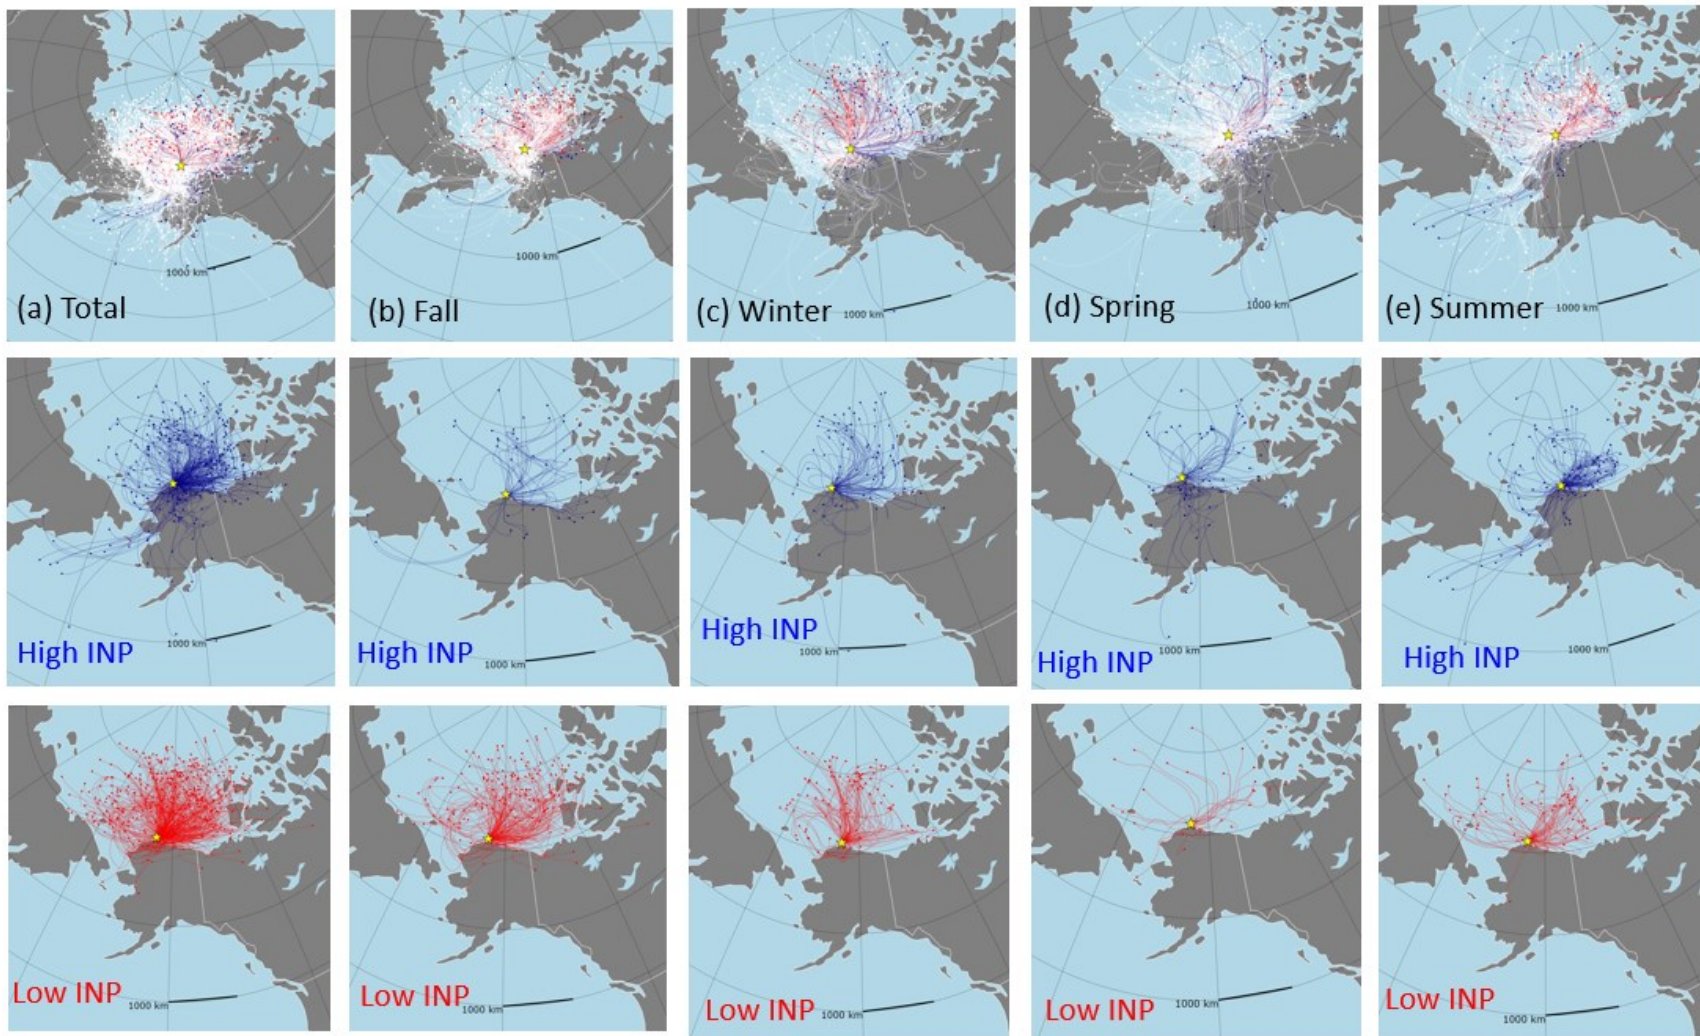

215

Figure S9. Air mass origins and back trajectories at the inlet height from BRW; all trajectories in October 2021 – December 2023. The air mass trajectories during high- and low-INP episodes are shown in blue and red colors. This figure represents the data selected with a low – high threshold of the 25<sup>th</sup> – 75<sup>th</sup> percentile based on  $n_s$ , at  $-30$ ,  $-25$ , and  $-20$  °C (below or above at ‘any’ temps). Figure S9a represents the overall data. Panels (b) – (e) are seasonal breakdowns of the ‘clean’ fall, winter, spring, and summer, respectively.

**Table S3. List of high- and low-INP periods from BRW for subsets of ‘all’ data. Note: refer to Sect. 3E in main manuscript for the selection criteria of high- and low-INP episodes and the difference between ‘all’ or ‘any’ examined temperatures. \*Clean data**

|         | ID | Date & Time (UTC)    | $n_d(m^{-2})$ |          |          |
|---------|----|----------------------|---------------|----------|----------|
|         |    |                      | -30 °C        | -25 °C   | -20 °C   |
| All Ts  | 1  | 5/9/2022 0:00        | 2.05E+10      | 2.24E+09 | 5.70E+08 |
| High    | 2  | 5/31/2022 18:00      | 2.38E+10      | 2.84E+09 | 7.23E+08 |
| INP     | 3  | 6/20/2022 6:00       | 1.60E+10      | 2.66E+09 | 3.26E+08 |
| n = 15  | 4  | 6/20/2022 0:00       | 3.96E+10      | 6.93E+09 | 3.34E+08 |
|         | 5  | 6/16/2022 6:00       | 3.87E+10      | 7.61E+09 | 1.31E+09 |
|         | 6  | 6/25/2022 0:00       | 5.86E+10      | 8.86E+09 | 5.91E+08 |
|         | 7  | *2022-06-24 12:00:00 | 1.69E+10      | 2.64E+09 | 5.33E+08 |
|         | 8  | 7/3/2022 18:00       | 1.01E+11      | 1.69E+10 | 3.51E+09 |
|         | 9  | 7/3/2022 12:00       | 6.00E+10      | 7.27E+09 | 3.73E+08 |
|         | 10 | 7/2/2022 18:00       | 8.59E+10      | 1.07E+10 | 8.40E+08 |
|         | 11 | 7/2/2022 6:00        | 1.94E+10      | 6.71E+09 | 8.19E+08 |
|         | 12 | 4/2/2023 18:00       | 2.44E+10      | 3.91E+09 | 5.63E+08 |
|         | 13 | 4/22/2023 0:00       | 2.45E+10      | 1.69E+09 | 4.67E+08 |
|         | 14 | 4/30/2023 12:00      | 2.19E+10      | 4.51E+09 | 3.34E+08 |
|         | 15 | 6/3/2023 18:00       | 4.15E+10      | 2.76E+09 | 1.63E+10 |
| All Ts  | 1  | 11/22/2021 0:00      | 7.73E+08      | 0        | 0        |
| Low     | 2  | 11/21/2021 12:00     | 4.02E+08      | 0        | 0        |
| INP     | 3  | 11/21/2021 6:00      | 1.42E+09      | 0        | 0        |
| n = 15  | 4  | 11/29/2021 6:00      | 0             | 0        | 0        |
|         | 5  | 11/28/2021 18:00     | 0             | 0        | 0        |
|         | 6  | 12/29/2021 6:00      | 0             | 0        | 0        |
|         | 7  | *2022-01-03 18:00:00 | 0             | 0        | 0        |
|         | 8  | *2022-01-08 18:00:00 | 0             | 0        | 0        |
|         | 9  | 1/14/2022 18:00      | 4.25E+08      | 0        | 0        |
|         | 10 | 1/14/2022 12:00      | 9.91E+08      | 0        | 0        |
|         | 11 | 1/13/2022 18:00      | 0             | 0        | 0        |
|         | 12 | *2022-01-21 06:00:00 | 0             | 0        | 0        |
|         | 13 | *2022-02-02 00:00:00 | 0             | 0        | 0        |
|         | 14 | *2022-02-06 12:00:00 | 0             | 0        | 0        |
|         | 15 | 2/10/2022 12:00      | 0             | 0        | 0        |
| Any Ts  | 1  | *2021-10-24 12:00:00 | 5.31E+09      | nan      | 2.52E+08 |
| High    | 2  | 10/20/2021 18:00     | 2.84E+11      | 2.82E+08 | 6.92E+07 |
| INP     | 3  | 10/25/2021 18:00     | nan           | 6.94E+08 | 6.42E+08 |
| n = 291 | 4  | 10/25/2021 6:00      | 2.29E+09      | nan      | 4.92E+08 |
|         | 5  | *2021-11-01 06:00:00 | nan           | 7.99E+09 | 3.78E+08 |
|         | 6  | 11/1/2021 0:00       | 8.55E+09      | 3.21E+09 | nan      |
|         | 7  | *2021-11-17 18:00:00 | 3.02E+10      | 9.85E+08 | nan      |
|         | 8  | 11/24/2021 0:00      | 1.39E+10      | nan      | nan      |
|         | 9  | 11/24/2021 18:00     | 2.71E+10      | 5.70E+09 | 0.00E+00 |
|         | 10 | 12/6/2021 0:00       | nan           | 4.44E+09 | 8.21E+08 |
|         | 11 | *2021-12-05 18:00:00 | 3.69E+10      | 2.96E+08 | nan      |
|         | 12 | 1/25/2022 0:00       | 2.56E+10      | nan      | nan      |
|         | 13 | 1/24/2022 18:00      | 2.67E+10      | nan      | 2.03E+08 |
|         | 14 | 1/24/2022 12:00      | nan           | 3.88E+08 | 3.73E+08 |
|         | 15 | 5/9/2022 6:00        | 2.12E+10      | 2.80E+09 | nan      |
|         | 16 | 5/9/2022 0:00        | 2.05E+10      | 2.24E+09 | 5.70E+08 |
|         | 17 | 5/6/2022 18:00       | 1.34E+10      | 3.82E+08 | nan      |
|         | 18 | *2022-05-16 06:00:00 | 1.33E+10      | 0.00E+00 | 3.46E+08 |
|         | 19 | 5/23/2022 0:00       | 1.23E+10      | nan      | 2.78E+08 |
|         | 20 | 5/22/2022 0:00       | 6.47E+09      | 2.98E+08 | 2.93E+08 |
|         | 21 | *2022-05-23 18:00:00 | 5.03E+09      | 2.86E+08 | 2.97E+08 |
|         | 22 | 6/4/2022 0:00        | 2.19E+10      | nan      | 5.69E+08 |
|         | 23 | *2022-06-03 12:00:00 | 1.21E+10      | 1.10E+09 | nan      |
|         | 24 | *2022-06-03 00:00:00 | 2.99E+10      | 1.18E+09 | nan      |
|         | 25 | 5/31/2022 18:00      | 2.38E+10      | 2.84E+09 | 7.23E+08 |
|         | 26 | 6/8/2022 12:00       | 1.39E+10      | 8.29E+08 | nan      |
|         | 27 | *2022-06-08 00:00:00 | 1.95E+10      | 2.06E+09 | 0.00E+00 |
|         | 28 | 6/7/2022 18:00       | 1.33E+10      | nan      | nan      |
|         | 29 | 6/4/2022 18:00       | 1.96E+10      | nan      | nan      |
|         | 30 | 6/16/2022 0:00       | 8.53E+10      | nan      | nan      |
|         | 31 | 6/12/2022 0:00       | 5.27E+10      | 3.28E+09 | 0.00E+00 |
|         | 32 | 6/11/2022 18:00      | 1.95E+10      | 2.40E+09 | 0.00E+00 |
|         | 33 | 6/11/2022 0:00       | 4.46E+10      | 4.78E+09 | nan      |
|         | 34 | *2022-06-10 18:00:00 | 5.03E+09      | 7.32E+09 | nan      |
|         | 35 | *2022-06-20 18:00:00 | 9.35E+09      | 2.08E+09 | nan      |
|         | 36 | 6/20/2022 6:00       | 1.60E+10      | 2.66E+09 | 3.26E+08 |
|         | 37 | 6/20/2022 0:00       | 3.96E+10      | 6.93E+09 | 3.34E+08 |
|         | 38 | *2022-06-17 00:00:00 | 2.38E+10      | nan      | 7.12E+08 |
|         | 39 | 6/16/2022 18:00      | 1.01E+12      | 6.63E+09 | nan      |
|         | 40 | 6/16/2022 6:00       | 3.87E+10      | 7.61E+09 | 1.31E+09 |
|         | 41 | 6/26/2022 0:00       | 1.29E+10      | nan      | 7.80E+08 |
|         | 42 | 6/25/2022 18:00      | 1.87E+10      | 3.01E+09 | nan      |
|         | 43 | 6/25/2022 12:00      | nan           | nan      | 6.93E+08 |
|         | 44 | 6/25/2022 6:00       | 7.02E+10      | 1.27E+10 | nan      |
|         | 45 | 6/25/2022 0:00       | 5.86E+10      | 8.86E+09 | 5.91E+08 |
|         | 46 | 6/24/2022 18:00      | 3.26E+10      | 4.84E+09 | nan      |
|         | 47 | *2022-06-24 12:00:00 | 1.69E+10      | 2.64E+09 | 5.33E+08 |
|         | 48 | *2022-06-24 00:00:00 | 1.80E+10      | 2.19E+10 | nan      |
|         | 49 | 6/23/2022 18:00      | 1.37E+10      | nan      | 3.41E+08 |
|         | 50 | 7/4/2022 0:00        | 1.26E+11      | 1.90E+10 | nan      |
|         | 51 | 7/3/2022 18:00       | 1.01E+11      | 1.69E+10 | 3.51E+09 |
|         | 52 | 7/3/2022 12:00       | 6.00E+10      | 7.27E+09 | 3.73E+08 |
|         | 53 | 7/3/2022 6:00        | 7.62E+10      | 1.22E+10 | nan      |
|         | 54 | 7/3/2022 0:00        | nan           | 1.40E+10 | 1.51E+08 |
|         | 55 | 7/2/2022 18:00       | 8.59E+10      | 1.07E+10 | 8.40E+08 |
|         | 56 | 7/2/2022 12:00       | 3.92E+10      | nan      | 2.35E+08 |

|     |                      |          |          |          |
|-----|----------------------|----------|----------|----------|
| 57  | 7/2/2022 6:00        | 1.94E+10 | 6.71E+09 | 8.19E+08 |
| 58  | 7/2/2022 0:00        | 3.26E+10 | 7.30E+09 | nan      |
| 59  | *2022-06-28 12:00:00 | 5.19E+10 | nan      | nan      |
| 60  | 7/10/2022 0:00       | 5.77E+10 | nan      | 8.09E+08 |
| 61  | 7/9/2022 18:00       | 2.55E+10 | 3.90E+09 | nan      |
| 62  | 7/9/2022 12:00       | 3.17E+10 | 1.02E+10 | 1.08E+08 |
| 63  | 7/9/2022 0:00        | nan      | 4.24E+09 | 6.32E+08 |
| 64  | 7/8/2022 18:00       | 1.63E+10 | nan      | nan      |
| 65  | 7/8/2022 12:00       | 1.87E+10 | 2.47E+09 | nan      |
| 66  | 7/8/2022 0:00        | nan      | nan      | 4.11E+08 |
| 67  | 7/7/2022 6:00        | nan      | 2.78E+09 | 3.95E+08 |
| 68  | 7/6/2022 0:00        | nan      | nan      | 1.04E+09 |
| 69  | 7/5/2022 18:00       | 6.88E+10 | nan      | nan      |
| 70  | *2022-07-05 12:00:00 | 5.19E+10 | 7.55E+09 | 0.00E+00 |
| 71  | *2022-07-05 06:00:00 | 6.07E+10 | nan      | nan      |
| 72  | 7/5/2022 0:00        | 5.49E+10 | 5.84E+09 | nan      |
| 73  | *2022-07-04 18:00:00 | nan      | 2.97E+09 | 3.77E+08 |
| 74  | 7/4/2022 12:00       | 2.89E+10 | 4.87E+09 | nan      |
| 75  | 7/13/2022 6:00       | 4.03E+10 | 4.75E+08 | nan      |
| 76  | 7/10/2022 18:00      | 3.49E+10 | 5.90E+09 | nan      |
| 77  | 7/10/2022 12:00      | 4.18E+10 | 3.44E+09 | nan      |
| 78  | 7/10/2022 6:00       | nan      | 3.52E+09 | 5.12E+08 |
| 79  | 7/18/2022 12:00      | nan      | 9.43E+09 | 1.12E+09 |
| 80  | 7/18/2022 0:00       | 4.99E+10 | 7.84E+09 | nan      |
| 81  | 7/17/2022 6:00       | nan      | 4.23E+08 | 4.48E+08 |
| 82  | 8/8/2022 6:00        | nan      | nan      | 4.84E+08 |
| 83  | *2022-08-05 06:00:00 | nan      | 5.12E+09 | 8.20E+08 |
| 84  | *2022-08-20 06:00:00 | 2.33E+09 | 2.35E+09 | nan      |
| 85  | 8/15/2022 12:00      | 3.46E+09 | 2.25E+09 | nan      |
| 86  | 8/27/2022 0:00       | nan      | 6.65E+09 | nan      |
| 87  | 8/26/2022 18:00      | 5.78E+10 | 3.47E+09 | nan      |
| 88  | 8/26/2022 12:00      | nan      | nan      | 2.65E+08 |
| 89  | *2022-08-26 06:00:00 | 3.69E+09 | nan      | 3.11E+08 |
| 90  | 9/1/2022 0:00        | 2.24E+09 | 7.28E+08 | 7.43E+08 |
| 91  | 8/30/2022 12:00      | nan      | 5.41E+08 | 1.66E+09 |
| 92  | 8/30/2022 0:00       | 3.63E+09 | 3.49E+09 | nan      |
| 93  | *2022-09-03 18:00:00 | 5.67E+09 | nan      | 9.27E+08 |
| 94  | *2022-09-03 12:00:00 | 2.14E+09 | 4.36E+09 | nan      |
| 95  | 9/13/2022 6:00       | nan      | nan      | 3.36E+08 |
| 96  | 9/14/2022 12:00      | 1.83E+09 | 3.11E+08 | 2.31E+08 |
| 97  | *2022-09-20 18:00:00 | 7.17E+09 | 1.93E+09 | nan      |
| 98  | *2022-09-20 06:00:00 | 4.37E+09 | 9.60E+09 | 2.10E+09 |
| 99  | 9/27/2022 0:00       | nan      | nan      | 3.14E+08 |
| 100 | 10/5/2022 6:00       | 1.58E+10 | 3.32E+09 | nan      |
| 101 | *2022-10-05 00:00:00 | 7.02E+09 | 3.09E+09 | nan      |
| 102 | 10/18/2022 0:00      | nan      | nan      | 2.41E+08 |
| 103 | 10/25/2022 18:00     | 9.96E+09 | 3.37E+09 | nan      |
| 104 | *2022-10-25 12:00:00 | 5.54E+09 | 1.07E+09 | 2.82E+08 |
| 105 | *2022-10-24 18:00:00 | 6.45E+09 | 2.45E+09 | nan      |
| 106 | *2022-10-24 12:00:00 | nan      | nan      | 4.26E+08 |
| 107 | 10/23/2022 12:00     | 1.76E+10 | 3.40E+09 | nan      |
| 108 | *2022-11-03 12:00:00 | nan      | nan      | 4.26E+08 |
| 109 | *2022-11-03 06:00:00 | 1.45E+10 | nan      | nan      |
| 110 | *2022-10-31 12:00:00 | 5.81E+09 | 3.99E+09 | nan      |
| 111 | *2022-11-07 18:00:00 | 4.57E+11 | nan      | nan      |
| 112 | 11/4/2022 6:00       | 1.27E+10 | nan      | nan      |
| 113 | 12/1/2022 6:00       | nan      | nan      | 1.16E+09 |
| 114 | 12/9/2022 6:00       | nan      | 2.46E+09 | nan      |
| 115 | *2022-12-09 00:00:00 | nan      | 2.26E+09 | nan      |
| 116 | 12/7/2022 0:00       | nan      | nan      | 8.88E+08 |
| 117 | 12/6/2022 18:00      | nan      | nan      | 6.44E+08 |
| 118 | 12/6/2022 12:00      | nan      | 2.23E+10 | nan      |
| 119 | *2022-12-06 06:00:00 | nan      | 5.95E+10 | nan      |
| 120 | *2022-12-05 12:00:00 | 4.03E+10 | nan      | nan      |
| 121 | 12/5/2022 6:00       | 1.70E+10 | nan      | nan      |
| 122 | 12/5/2022 0:00       | 1.45E+10 | nan      | nan      |
| 123 | 12/4/2022 18:00      | 6.81E+10 | nan      | nan      |
| 124 | 12/12/2022 6:00      | nan      | 2.00E+09 | nan      |
| 125 | 12/11/2022 6:00      | 1.18E+10 | nan      | nan      |
| 126 | *2022-12-11 00:00:00 | 1.52E+10 | nan      | nan      |
| 127 | 12/20/2022 12:00     | 2.10E+10 | nan      | nan      |
| 128 | *2022-12-20 00:00:00 | 2.06E+10 | nan      | nan      |
| 129 | 12/27/2022 0:00      | 1.25E+10 | nan      | nan      |
| 130 | *2022-12-26 00:00:00 | 1.39E+10 | nan      | nan      |
| 131 | *2022-12-25 00:00:00 | 3.33E+10 | nan      | nan      |
| 132 | *2022-12-24 00:00:00 | 9.26E+10 | nan      | nan      |
| 133 | 12/22/2022 18:00     | nan      | 3.18E+09 | nan      |
| 134 | 12/27/2022 0:00      | 1.25E+10 | nan      | nan      |
| 135 | 1/7/2023 0:00        | 1.39E+10 | nan      | nan      |
| 136 | 1/6/2023 12:00       | 1.72E+10 | nan      | nan      |
| 137 | 1/5/2023 12:00       | nan      | 2.59E+09 | nan      |
| 138 | 1/5/2023 6:00        | nan      | 1.76E+09 | nan      |
| 139 | 1/1/2023 12:00       | 1.15E+10 | nan      | nan      |
| 140 | 1/10/2023 0:00       | 1.55E+10 | nan      | nan      |
| 141 | 1/9/2023 0:00        | 1.16E+10 | nan      | nan      |
| 142 | 1/8/2023 0:00        | 1.35E+10 | nan      | nan      |
| 143 | 1/7/2023 12:00       | 1.38E+10 | nan      | nan      |
| 144 | 1/17/2023 12:00      | 3.28E+10 | nan      | nan      |
| 145 | 1/14/2023 12:00      | 2.24E+10 | nan      | nan      |
| 146 | 1/14/2023 0:00       | 1.60E+10 | nan      | nan      |
| 147 | 1/13/2023 18:00      | 1.59E+10 | nan      | nan      |
| 148 | 1/13/2023 12:00      | 1.66E+10 | nan      | nan      |
| 149 | 1/25/2023 0:00       | 1.64E+10 | nan      | nan      |



|     |                      |          |          |          |
|-----|----------------------|----------|----------|----------|
| 150 | 1/31/2023 0:00       | 1.16E+10 | nan      | nan      |
| 151 | 1/30/2023 12:00      | 1.49E+10 | nan      | nan      |
| 152 | 1/30/2023 0:00       | 1.94E+10 | nan      | nan      |
| 153 | 1/29/2023 12:00      | nan      | 5.76E+09 | nan      |
| 154 | *2023-01-29 06:00:00 | nan      | 1.74E+09 | nan      |
| 155 | *2023-01-29 00:00:00 | nan      | 5.79E+09 | nan      |
| 156 | 1/28/2023 12:00      | 6.27E+10 | nan      | nan      |
| 157 | 1/28/2023 6:00       | 2.96E+10 | nan      | nan      |
| 158 | 1/28/2023 0:00       | 5.19E+10 | nan      | nan      |
| 159 | 1/27/2023 18:00      | 2.00E+10 | nan      | nan      |
| 160 | 1/27/2023 12:00      | 7.34E+10 | nan      | nan      |
| 161 | 1/27/2023 0:00       | 7.34E+10 | nan      | nan      |
| 162 | 1/26/2023 18:00      | 1.32E+10 | nan      | nan      |
| 163 | 1/26/2023 12:00      | 1.30E+10 | nan      | nan      |
| 164 | 1/25/2023 12:00      | 8.98E+10 | nan      | nan      |
| 165 | *2023-02-06 00:00:00 | 1.67E+10 | nan      | nan      |
| 166 | 2/4/2023 12:00       | 1.64E+10 | nan      | nan      |
| 167 | 2/4/2023 0:00        | 2.13E+10 | nan      | nan      |
| 168 | 2/3/2023 18:00       | 1.82E+10 | nan      | nan      |
| 169 | 2/3/2023 12:00       | 2.08E+10 | nan      | nan      |
| 170 | 2/2/2023 12:00       | 1.28E+10 | nan      | nan      |
| 171 | 2/1/2023 12:00       | 1.24E+10 | nan      | nan      |
| 172 | *2023-02-08 00:00:00 | 2.57E+10 | nan      | nan      |
| 173 | *2023-02-06 12:00:00 | 1.35E+11 | nan      | nan      |
| 174 | 2/12/2023 12:00      | 1.23E+10 | nan      | nan      |
| 175 | 2/23/2023 12:00      | 9.13E+10 | 5.35E+10 | nan      |
| 176 | 2/23/2023 6:00       | 2.57E+10 | nan      | nan      |
| 177 | 2/23/2023 0:00       | 1.42E+10 | nan      | nan      |
| 178 | 2/22/2023 0:00       | 1.30E+10 | nan      | nan      |
| 179 | *2023-02-19 12:00:00 | 2.96E+10 | nan      | nan      |
| 180 | 2/19/2023 6:00       | 1.24E+10 | nan      | nan      |
| 181 | 2/19/2023 0:00       | 4.18E+10 | nan      | nan      |
| 182 | 2/18/2023 12:00      | 2.45E+10 | nan      | nan      |
| 183 | *2023-02-28 12:00:00 | 1.35E+10 | nan      | nan      |
| 184 | 3/8/2023 0:00        | nan      | nan      | 7.33E+08 |
| 185 | *2023-03-07 18:00:00 | nan      | nan      | 5.19E+09 |
| 186 | *2023-03-07 06:00:00 | nan      | 5.45E+09 | nan      |
| 187 | *2023-03-06 12:00:00 | 2.15E+10 | nan      | nan      |
| 188 | *2023-03-06 06:00:00 | 2.25E+10 | nan      | nan      |
| 189 | 3/6/2023 0:00        | 1.69E+10 | nan      | nan      |
| 190 | 3/5/2023 12:00       | 1.26E+10 | nan      | nan      |
| 191 | 3/20/2023 0:00       | 3.74E+10 | nan      | nan      |
| 192 | 3/19/2023 18:00      | 2.18E+10 | nan      | nan      |
| 193 | *2023-03-18 12:00:00 | 2.58E+10 | nan      | nan      |
| 194 | 3/24/2023 0:00       | nan      | 2.09E+09 | nan      |
| 195 | 3/23/2023 18:00      | nan      | 1.83E+09 | nan      |
| 196 | 3/23/2023 12:00      | nan      | 3.94E+09 | nan      |
| 197 | *2023-03-22 12:00:00 | nan      | 3.94E+09 | nan      |
| 198 | 3/22/2023 0:00       | nan      | 7.54E+09 | nan      |
| 199 | *2023-03-21 12:00:00 | 2.09E+10 | 4.70E+09 | nan      |
| 200 | 3/21/2023 6:00       | 2.91E+10 | nan      | nan      |
| 201 | *2023-03-21 00:00:00 | 7.15E+10 | nan      | nan      |
| 202 | 3/31/2023 0:00       | nan      | 2.78E+09 | nan      |
| 203 | 4/2/2023 18:00       | 2.44E+10 | 3.91E+09 | 5.63E+08 |
| 204 | 4/2/2023 12:00       | nan      | nan      | 4.63E+08 |
| 205 | *2023-04-02 00:00:00 | nan      | nan      | 6.26E+09 |
| 206 | 4/10/2023 0:00       | 3.69E+10 | nan      | nan      |
| 207 | 4/9/2023 18:00       | 3.60E+10 | nan      | nan      |
| 208 | 4/9/2023 12:00       | 2.11E+10 | 6.62E+09 | nan      |
| 209 | *2023-04-07 12:00:00 | nan      | 2.53E+09 | nan      |
| 210 | *2023-04-07 00:00:00 | nan      | 3.65E+09 | nan      |
| 211 | 4/16/2023 6:00       | nan      | 2.44E+09 | nan      |
| 212 | *2023-04-16 00:00:00 | 2.42E+10 | 1.62E+09 | nan      |
| 213 | 4/24/2023 0:00       | 3.39E+10 | 3.25E+09 | nan      |
| 214 | *2023-04-23 18:00:00 | nan      | 6.91E+09 | nan      |
| 215 | 4/23/2023 6:00       | 3.11E+10 | 4.94E+09 | nan      |
| 216 | 4/23/2023 0:00       | 3.72E+10 | 3.47E+09 | nan      |
| 217 | 4/22/2023 18:00      | nan      | 2.87E+09 | nan      |
| 218 | 4/22/2023 12:00      | 3.31E+10 | nan      | nan      |
| 219 | 4/22/2023 6:00       | 2.88E+10 | nan      | nan      |
| 220 | 4/22/2023 0:00       | 2.45E+10 | 1.69E+09 | 4.67E+08 |
| 221 | 4/21/2023 18:00      | 4.56E+10 | 3.54E+09 | nan      |
| 222 | *2023-04-20 12:00:00 | 2.35E+10 | 5.78E+09 | nan      |
| 223 | 4/29/2023 12:00      | 2.38E+10 | 1.34E+09 | nan      |
| 224 | 4/28/2023 18:00      | 2.76E+10 | 1.44E+09 | 2.31E+08 |
| 225 | 4/28/2023 0:00       | 1.60E+10 | 6.69E+08 | nan      |
| 226 | 4/27/2023 0:00       | nan      | nan      | 6.38E+08 |
| 227 | *2023-04-25 06:00:00 | 3.56E+10 | nan      | nan      |
| 228 | 4/24/2023 18:00      | 1.66E+10 | nan      | nan      |
| 229 | *2023-05-06 00:00:00 | 6.82E+09 | 5.29E+09 | nan      |
| 230 | 5/2/2023 18:00       | 9.79E+09 | nan      | 3.02E+08 |
| 231 | 5/1/2023 18:00       | 1.47E+10 | 1.15E+09 | nan      |
| 232 | 5/1/2023 6:00        | 1.61E+10 | 1.85E+09 | 0.00E+00 |
| 233 | 5/1/2023 0:00        | 1.90E+10 | 1.82E+09 | nan      |
| 234 | 4/30/2023 18:00      | 2.97E+10 | nan      | 5.55E+08 |
| 235 | 4/30/2023 12:00      | 2.19E+10 | 4.51E+09 | 3.34E+08 |
| 236 | 5/11/2023 0:00       | 7.37E+09 | 1.70E+09 | nan      |
| 237 | 5/17/2023 0:00       | 1.16E+10 | 1.50E+09 | nan      |
| 238 | *2023-05-14 00:00:00 | 1.33E+10 | 1.50E+09 | nan      |
| 239 | 6/4/2023 0:00        | 4.17E+10 | 7.62E+09 | 0.00E+00 |
| 240 | 6/3/2023 18:00       | 4.15E+10 | 2.76E+09 | 1.63E+10 |
| 241 | 6/2/2023 18:00       | 8.54E+09 | 1.24E+09 | 5.99E+08 |
| 242 | 6/2/2023 12:00       | 9.01E+09 | 4.15E+09 | 4.00E+09 |

|         |                      |                      |          |          |          |
|---------|----------------------|----------------------|----------|----------|----------|
| 243     | *2023-06-02 00:00:00 | 5.07E+09             | 3.38E+09 | nan      |          |
| 244     | 6/11/2023 0:00       | 1.94E+10             | nan      | nan      |          |
| 245     | 6/9/2023 0:00        | nan                  | nan      | 6.16E+08 |          |
| 246     | 6/8/2023 18:00       | nan                  | nan      | 2.58E+08 |          |
| 247     | 6/8/2023 12:00       | nan                  | nan      | 5.70E+09 |          |
| 248     | 6/7/2023 18:00       | 1.85E+10             | nan      | nan      |          |
| 249     | 6/7/2023 12:00       | nan                  | 3.85E+09 | nan      |          |
| 250     | 6/7/2023 0:00        | nan                  | 2.96E+09 | nan      |          |
| 251     | 6/6/2023 18:00       | nan                  | 2.24E+09 | nan      |          |
| 252     | 6/6/2023 12:00       | nan                  | 2.14E+09 | nan      |          |
| 253     | 6/6/2023 6:00        | nan                  | nan      | 7.03E+08 |          |
| 254     | *2023-06-06 00:00:00 | nan                  | nan      | 2.14E+09 |          |
| 255     | *2023-06-05 06:00:00 | 1.72E+10             | 1.51E+09 | nan      |          |
| 256     | 6/11/2023 6:00       | 1.20E+10             | nan      | nan      |          |
| 257     | 7/23/2023 0:00       | nan                  | nan      | 3.41E+08 |          |
| 258     | 7/26/2023 6:00       | nan                  | nan      | 9.70E+08 |          |
| 259     | 7/26/2023 0:00       | nan                  | nan      | 2.49E+08 |          |
| 260     | 7/25/2023 6:00       | nan                  | 3.69E+09 | 6.21E+08 |          |
| 261     | 7/25/2023 0:00       | 1.40E+10             | 1.57E+09 | nan      |          |
| 262     | 7/24/2023 18:00      | nan                  | nan      | 2.48E+09 |          |
| 263     | 8/4/2023 6:00        | nan                  | nan      | 9.80E+08 |          |
| 264     | 8/1/2023 12:00       | 1.01E+10             | 1.84E+09 | nan      |          |
| 265     | 8/1/2023 18:00       | nan                  | 2.70E+08 | 1.65E+09 |          |
| 266     | 8/11/2023 12:00      | 2.10E+09             | nan      | 4.82E+08 |          |
| 267     | 9/3/2023 12:00       | nan                  | nan      | 6.84E+08 |          |
| 268     | 9/5/2023 18:00       | nan                  | 5.84E+08 | 2.53E+08 |          |
| 269     | 9/11/2023 18:00      | 1.72E+09             | nan      | 6.61E+08 |          |
| 270     | 9/11/2023 6:00       | nan                  | nan      | 5.68E+09 |          |
| 271     | 9/19/2023 6:00       | nan                  | nan      | 3.42E+08 |          |
| 272     | 9/19/2023 0:00       | 4.38E+09             | nan      | 4.63E+08 |          |
| 273     | 9/18/2023 18:00      | 1.88E+09             | 4.61E+08 | 2.31E+08 |          |
| 274     | 9/17/2023 12:00      | nan                  | nan      | 2.78E+08 |          |
| 275     | 11/2/2023 12:00      | 2.30E+09             | 2.30E+08 | 4.62E+08 |          |
| 276     | 11/1/2023 18:00      | nan                  | 3.43E+09 | nan      |          |
| 277     | 10/31/2023 18:00     | nan                  | 2.65E+09 | nan      |          |
| 278     | 10/31/2023 12:00     | nan                  | 1.83E+09 | nan      |          |
| 279     | 10/30/2023 6:00      | 1.31E+10             | 3.99E+08 | 1.62E+08 |          |
| 280     | *2023-12-08 18:00:00 | 1.19E+10             | 2.24E+09 | nan      |          |
| 281     | 12/12/2023 18:00     | nan                  | nan      | 1.05E+09 |          |
| 282     | *2023-12-11 06:00:00 | 2.39E+10             | nan      | nan      |          |
| 283     | *2023-12-10 12:00:00 | 1.70E+10             | 7.44E+08 | nan      |          |
| 284     | *2023-12-10 06:00:00 | 1.59E+10             | 1.13E+09 | nan      |          |
| 285     | *2023-12-22 00:00:00 | 1.62E+10             | 1.01E+09 | nan      |          |
| 286     | 12/20/2023 18:00     | 1.27E+10             | 1.53E+09 | nan      |          |
| 287     | 12/17/2023 6:00      | 1.58E+10             | nan      | nan      |          |
| 288     | 12/17/2023 0:00      | 1.77E+10             | 1.03E+09 | nan      |          |
| 289     | 12/23/2023 18:00     | 2.28E+10             | 1.21E+09 | nan      |          |
| 290     | 12/23/2023 6:00      | 1.40E+10             | nan      | nan      |          |
| 291     | 12/22/2023 18:00     | 1.98E+10             | 3.69E+09 | 0.00E+00 |          |
| Any Ts  | 1                    | 10/25/2021 0:00      | 1.91E+09 | 0.00E+00 | 0.00E+00 |
| Low     | 2                    | *2021-10-23 06:00:00 | 9.36E+09 | 0.00E+00 | nan      |
| INP     | 3                    | *2021-10-22 12:00:00 | 1.15E+09 | 0.00E+00 | nan      |
| n = 364 | 4                    | 10/22/2021 6:00      | 2.13E+09 | nan      | 0.00E+00 |
|         | 5                    | 10/22/2021 0:00      | 3.09E+09 | nan      | 0.00E+00 |
|         | 6                    | 10/28/2021 18:00     | 3.48E+09 | 1.13E+09 | 0.00E+00 |
|         | 7                    | 10/28/2021 12:00     | nan      | 9.82E+08 | 0.00E+00 |
|         | 8                    | *2021-10-28 06:00:00 | 1.83E+09 | 8.98E+08 | 0.00E+00 |
|         | 9                    | 10/26/2021 0:00      | 3.14E+09 | 0.00E+00 | 0.00E+00 |
|         | 10                   | 10/25/2021 12:00     | 2.95E+09 | 0.00E+00 | 0.00E+00 |
|         | 11                   | 11/6/2021 0:00       | 2.71E+09 | nan      | 0.00E+00 |
|         | 12                   | 11/5/2021 18:00      | 4.59E+08 | nan      | nan      |
|         | 13                   | 11/5/2021 12:00      | nan      | 4.42E+07 | 0.00E+00 |
|         | 14                   | 11/5/2021 6:00       | 2.90E+08 | nan      | 0.00E+00 |
|         | 15                   | 11/5/2021 0:00       | 3.04E+08 | 6.39E+07 | nan      |
|         | 16                   | *2021-11-04 12:00:00 | 1.42E+09 | 6.94E+08 | 0.00E+00 |
|         | 17                   | 11/3/2021 18:00      | 1.74E+09 | nan      | 0.00E+00 |
|         | 18                   | 11/3/2021 12:00      | 1.12E+09 | 6.75E+07 | 0.00E+00 |
|         | 19                   | 11/3/2021 6:00       | 1.06E+09 | 4.90E+08 | 5.68E+07 |
|         | 20                   | 11/3/2021 0:00       | 9.29E+08 | nan      | 1.30E+08 |
|         | 21                   | 11/2/2021 18:00      | 0.00E+00 | nan      | 0.00E+00 |
|         | 22                   | *2021-11-02 12:00:00 | 0.00E+00 | nan      | 0.00E+00 |
|         | 23                   | 10/31/2021 12:00     | 5.18E+08 | nan      | 0.00E+00 |
|         | 24                   | 11/11/2021 12:00     | nan      | 0.00E+00 | nan      |
|         | 25                   | 11/11/2021 6:00      | 1.58E+09 | 0.00E+00 | nan      |
|         | 26                   | 11/11/2021 0:00      | 8.37E+09 | 4.28E+08 | 0.00E+00 |
|         | 27                   | 11/10/2021 12:00     | 7.78E+09 | 0.00E+00 | nan      |
|         | 28                   | 11/10/2021 6:00      | 1.03E+10 | nan      | 0.00E+00 |
|         | 29                   | *2021-11-09 18:00:00 | 4.90E+09 | 0.00E+00 | 0.00E+00 |
|         | 30                   | *2021-11-09 06:00:00 | 6.98E+09 | nan      | 0.00E+00 |
|         | 31                   | *2021-11-07 18:00:00 | 9.89E+08 | 1.31E+08 | 1.29E+08 |
|         | 32                   | 11/6/2021 6:00       | 2.59E+09 | 3.50E+08 | 0.00E+00 |
|         | 33                   | 11/17/2021 6:00      | nan      | nan      | 0.00E+00 |
|         | 34                   | 11/17/2021 0:00      | 0.00E+00 | 0.00E+00 | nan      |
|         | 35                   | *2021-11-16 18:00:00 | 1.18E+09 | nan      | nan      |
|         | 36                   | *2021-11-16 06:00:00 | 9.00E+08 | nan      | 0.00E+00 |
|         | 37                   | *2021-11-12 18:00:00 | 6.63E+09 | nan      | 0.00E+00 |
|         | 38                   | 11/23/2021 18:00     | nan      | 2.76E+08 | 0.00E+00 |
|         | 39                   | 11/22/2021 18:00     | 1.73E+09 | 0.00E+00 | nan      |
|         | 40                   | 11/22/2021 12:00     | 1.58E+09 | 0.00E+00 | 0.00E+00 |
|         | 41                   | 11/22/2021 6:00      | 7.10E+08 | 0.00E+00 | nan      |
|         | 42                   | 11/22/2021 0:00      | 7.73E+08 | 0.00E+00 | 0.00E+00 |
|         | 43                   | 11/21/2021 18:00     | 0.00E+00 | nan      | nan      |
|         | 44                   | 11/21/2021 12:00     | 4.02E+08 | 0.00E+00 | 0.00E+00 |

|     |                      |          |          |          |
|-----|----------------------|----------|----------|----------|
| 45  | 11/21/2021 6:00      | 1.42E+09 | 0.00E+00 | 0.00E+00 |
| 46  | *2021-11-21 00:00:00 | 9.65E+09 | 0.00E+00 | 0.00E+00 |
| 47  | 11/20/2021 18:00     | 3.70E+09 | 0.00E+00 | nan      |
| 48  | 11/20/2021 6:00      | 3.03E+09 | 2.42E+08 | 0.00E+00 |
| 49  | *2021-11-20 00:00:00 | 8.43E+09 | 4.00E+08 | 0.00E+00 |
| 50  | 11/30/2021 0:00      | nan      | 0.00E+00 | 0.00E+00 |
| 51  | 11/29/2021 18:00     | 0.00E+00 | 0.00E+00 | nan      |
| 52  | 11/29/2021 12:00     | 9.08E+08 | nan      | 0.00E+00 |
| 53  | 11/29/2021 6:00      | 0.00E+00 | 0.00E+00 | 0.00E+00 |
| 54  | 11/29/2021 0:00      | 0.00E+00 | nan      | nan      |
| 55  | 11/28/2021 18:00     | 0.00E+00 | 0.00E+00 | 0.00E+00 |
| 56  | 11/28/2021 12:00     | 0.00E+00 | nan      | 0.00E+00 |
| 57  | *2021-11-28 06:00:00 | 7.88E+08 | nan      | nan      |
| 58  | *2021-11-28 00:00:00 | 1.19E+08 | nan      | nan      |
| 59  | 11/27/2021 12:00     | 0.00E+00 | 0.00E+00 | nan      |
| 60  | 11/27/2021 6:00      | 0.00E+00 | 0.00E+00 | nan      |
| 61  | 11/27/2021 0:00      | 0.00E+00 | nan      | 0.00E+00 |
| 62  | 11/26/2021 18:00     | 5.46E+09 | 0.00E+00 | 0.00E+00 |
| 63  | 11/26/2021 12:00     | 0.00E+00 | 0.00E+00 | nan      |
| 64  | 11/26/2021 0:00      | 0.00E+00 | nan      | 0.00E+00 |
| 65  | 11/25/2021 18:00     | 0.00E+00 | 0.00E+00 | nan      |
| 66  | 11/25/2021 12:00     | 7.60E+08 | 0.00E+00 | nan      |
| 67  | 11/25/2021 6:00      | nan      | nan      | 0.00E+00 |
| 68  | 11/25/2021 0:00      | 7.44E+09 | 0.00E+00 | nan      |
| 69  | 11/24/2021 12:00     | nan      | nan      | 0.00E+00 |
| 70  | *2021-12-03 12:00:00 | 0.00E+00 | nan      | 0.00E+00 |
| 71  | *2021-12-03 06:00:00 | 0.00E+00 | 0.00E+00 | nan      |
| 72  | *2021-12-02 06:00:00 | 0.00E+00 | nan      | nan      |
| 73  | 12/2/2021 0:00       | nan      | 0.00E+00 | nan      |
| 74  | 12/1/2021 18:00      | 0.00E+00 | 0.00E+00 | nan      |
| 75  | 12/1/2021 12:00      | 0.00E+00 | 0.00E+00 | nan      |
| 76  | 12/1/2021 6:00       | 0.00E+00 | 0.00E+00 | nan      |
| 77  | 12/1/2021 0:00       | 0.00E+00 | nan      | 0.00E+00 |
| 78  | 11/30/2021 18:00     | nan      | nan      | 0.00E+00 |
| 79  | 11/30/2021 12:00     | 0.00E+00 | 0.00E+00 | nan      |
| 80  | 11/30/2021 6:00      | 0.00E+00 | nan      | nan      |
| 81  | 12/18/2021 0:00      | 0.00E+00 | 0.00E+00 | nan      |
| 82  | 12/17/2021 12:00     | 2.38E+07 | 0.00E+00 | nan      |
| 83  | 12/17/2021 0:00      | 1.68E+09 | 0.00E+00 | nan      |
| 84  | 12/16/2021 18:00     | 1.26E+09 | nan      | nan      |
| 85  | 12/16/2021 12:00     | 1.58E+09 | 0.00E+00 | 0.00E+00 |
| 86  | 12/16/2021 6:00      | 0.00E+00 | nan      | 0.00E+00 |
| 87  | 12/15/2021 18:00     | 0.00E+00 | nan      | 0.00E+00 |
| 88  | 12/15/2021 6:00      | 0.00E+00 | 0.00E+00 | nan      |
| 89  | *2021-12-15 00:00:00 | 0.00E+00 | nan      | 0.00E+00 |
| 90  | 12/20/2021 0:00      | nan      | nan      | 0.00E+00 |
| 91  | 12/19/2021 18:00     | 4.52E+09 | nan      | 0.00E+00 |
| 92  | 12/19/2021 12:00     | 6.14E+07 | nan      | 0.00E+00 |
| 93  | 12/19/2021 6:00      | 2.82E+09 | nan      | 0.00E+00 |
| 94  | 12/19/2021 0:00      | 4.15E+08 | nan      | 0.00E+00 |
| 95  | 12/18/2021 18:00     | 3.27E+09 | 0.00E+00 | nan      |
| 96  | 12/18/2021 6:00      | 0.00E+00 | 1.28E+08 | 0.00E+00 |
| 97  | *2021-12-29 18:00:00 | nan      | nan      | 0.00E+00 |
| 98  | 12/29/2021 12:00     | 0.00E+00 | nan      | nan      |
| 99  | 12/29/2021 6:00      | 0.00E+00 | 0.00E+00 | 0.00E+00 |
| 100 | 12/29/2021 0:00      | 0.00E+00 | nan      | 0.00E+00 |
| 101 | *2021-12-28 18:00:00 | 0.00E+00 | nan      | 0.00E+00 |
| 102 | 12/27/2021 0:00      | 1.90E+09 | 0.00E+00 | 0.00E+00 |
| 103 | 12/26/2021 18:00     | 7.01E+09 | 0.00E+00 | nan      |
| 104 | 12/26/2021 6:00      | 2.85E+09 | nan      | 0.00E+00 |
| 105 | 12/26/2021 0:00      | 1.89E+09 | 0.00E+00 | nan      |
| 106 | *2022-01-03 18:00:00 | 0.00E+00 | 0.00E+00 | 0.00E+00 |
| 107 | *2022-01-10 00:00:00 | 0.00E+00 | 0.00E+00 | nan      |
| 108 | 1/9/2022 18:00       | 0.00E+00 | nan      | 0.00E+00 |
| 109 | 1/9/2022 6:00        | 0.00E+00 | nan      | nan      |
| 110 | 1/9/2022 0:00        | 0.00E+00 | nan      | 0.00E+00 |
| 111 | *2022-01-08 18:00:00 | 0.00E+00 | 0.00E+00 | 0.00E+00 |
| 112 | 1/17/2022 0:00       | 0.00E+00 | nan      | 0.00E+00 |
| 113 | 1/16/2022 18:00      | 1.49E+08 | 0.00E+00 | nan      |
| 114 | 1/16/2022 12:00      | 0.00E+00 | nan      | nan      |
| 115 | 1/16/2022 6:00       | 0.00E+00 | nan      | 0.00E+00 |
| 116 | 1/16/2022 0:00       | 4.78E+08 | nan      | 8.29E+07 |
| 117 | 1/15/2022 18:00      | 0.00E+00 | 1.47E+08 | nan      |
| 118 | 1/15/2022 12:00      | 0.00E+00 | nan      | 0.00E+00 |
| 119 | 1/15/2022 6:00       | 0.00E+00 | nan      | 0.00E+00 |
| 120 | 1/15/2022 0:00       | 3.44E+07 | nan      | 0.00E+00 |
| 121 | 1/14/2022 18:00      | 4.25E+08 | 0.00E+00 | 0.00E+00 |
| 122 | 1/14/2022 12:00      | 9.91E+08 | 0.00E+00 | 0.00E+00 |
| 123 | 1/14/2022 6:00       | 0.00E+00 | 0.00E+00 | nan      |
| 124 | 1/14/2022 0:00       | 0.00E+00 | 0.00E+00 | nan      |
| 125 | 1/13/2022 18:00      | 0.00E+00 | 0.00E+00 | 0.00E+00 |
| 126 | 1/13/2022 12:00      | 0.00E+00 | nan      | nan      |
| 127 | *2022-01-13 06:00:00 | 0.00E+00 | nan      | nan      |
| 128 | 1/13/2022 0:00       | 0.00E+00 | nan      | nan      |
| 129 | 1/12/2022 18:00      | 0.00E+00 | 0.00E+00 | nan      |
| 130 | *2022-01-12 12:00:00 | 1.37E+09 | nan      | 0.00E+00 |
| 131 | 1/23/2022 0:00       | nan      | 0.00E+00 | 0.00E+00 |
| 132 | 1/22/2022 18:00      | 0.00E+00 | 0.00E+00 | nan      |
| 133 | 1/22/2022 12:00      | 0.00E+00 | nan      | nan      |
| 134 | 1/22/2022 6:00       | nan      | 0.00E+00 | 0.00E+00 |
| 135 | 1/22/2022 0:00       | 0.00E+00 | 0.00E+00 | nan      |
| 136 | 1/21/2022 18:00      | 0.00E+00 | nan      | nan      |
| 137 | *2022-01-21 06:00:00 | 0.00E+00 | 0.00E+00 | 0.00E+00 |

|     |                      |          |          |          |
|-----|----------------------|----------|----------|----------|
| 138 | 1/17/2022 12:00      | 0.00E+00 | nan      | nan      |
| 139 | 1/17/2022 6:00       | 0.00E+00 | 0.00E+00 | nan      |
| 140 | 1/23/2022 6:00       | 0.00E+00 | nan      | 0.00E+00 |
| 141 | 2/3/2022 12:00       | 0.00E+00 | 0.00E+00 | nan      |
| 142 | 2/3/2022 6:00        | 0.00E+00 | 0.00E+00 | nan      |
| 143 | 2/3/2022 0:00        | 1.68E+09 | nan      | 0.00E+00 |
| 144 | 2/2/2022 18:00       | 0.00E+00 | 0.00E+00 | nan      |
| 145 | 2/2/2022 12:00       | 0.00E+00 | 0.00E+00 | nan      |
| 146 | 2/2/2022 6:00        | nan      | 0.00E+00 | 0.00E+00 |
| 147 | *2022-02-02 00:00:00 | 0.00E+00 | 0.00E+00 | 0.00E+00 |
| 148 | *2022-02-01 18:00:00 | 0.00E+00 | nan      | 0.00E+00 |
| 149 | 2/10/2022 0:00       | 0.00E+00 | 0.00E+00 | nan      |
| 150 | 2/9/2022 18:00       | 0.00E+00 | 0.00E+00 | nan      |
| 151 | 2/9/2022 12:00       | 0.00E+00 | nan      | 0.00E+00 |
| 152 | 2/9/2022 6:00        | 0.00E+00 | nan      | 0.00E+00 |
| 153 | 2/9/2022 0:00        | 0.00E+00 | nan      | nan      |
| 154 | 2/8/2022 18:00       | 0.00E+00 | nan      | 0.00E+00 |
| 155 | 2/7/2022 6:00        | 0.00E+00 | nan      | nan      |
| 156 | 2/7/2022 0:00        | 0.00E+00 | nan      | 0.00E+00 |
| 157 | 2/6/2022 18:00       | 0.00E+00 | nan      | nan      |
| 158 | *2022-02-06 12:00:00 | 0.00E+00 | 0.00E+00 | 0.00E+00 |
| 159 | 2/10/2022 12:00      | 0.00E+00 | 0.00E+00 | 0.00E+00 |
| 160 | 2/10/2022 6:00       | 0.00E+00 | nan      | 0.00E+00 |
| 161 | 2/18/2022 12:00      | 0.00E+00 | 0.00E+00 | nan      |
| 162 | 2/18/2022 6:00       | 0.00E+00 | nan      | nan      |
| 163 | 5/8/2022 12:00       | nan      | 1.12E+09 | 0.00E+00 |
| 164 | 5/7/2022 0:00        | 1.14E+10 | 4.54E+08 | 0.00E+00 |
| 165 | 5/22/2022 12:00      | 9.79E+09 | 0.00E+00 | 0.00E+00 |
| 166 | 5/21/2022 18:00      | 9.17E+09 | 1.24E+09 | 0.00E+00 |
| 167 | *2022-05-21 06:00:00 | 7.33E+09 | 1.17E+09 | 0.00E+00 |
| 168 | 5/19/2022 6:00       | 8.49E+09 | 6.61E+08 | 0.00E+00 |
| 169 | 5/18/2022 18:00      | 1.15E+10 | nan      | 0.00E+00 |
| 170 | 5/18/2022 12:00      | 9.93E+09 | 0.00E+00 | nan      |
| 171 | 5/17/2022 18:00      | 1.57E+10 | 0.00E+00 | 0.00E+00 |
| 172 | *2022-05-17 06:00:00 | 1.33E+10 | 0.00E+00 | 0.00E+00 |
| 173 | 5/28/2022 6:00       | 1.06E+10 | nan      | 0.00E+00 |
| 174 | *2022-05-25 06:00:00 | 2.35E+09 | 0.00E+00 | nan      |
| 175 | 6/3/2022 18:00       | 7.99E+09 | nan      | 0.00E+00 |
| 176 | 5/31/2022 12:00      | 4.96E+09 | 0.00E+00 | nan      |
| 177 | 5/31/2022 6:00       | nan      | 0.00E+00 | nan      |
| 178 | 6/7/2022 12:00       | 1.11E+10 | 0.00E+00 | nan      |
| 179 | *2022-06-06 18:00:00 | 2.35E+09 | nan      | 0.00E+00 |
| 180 | 6/5/2022 12:00       | 2.46E+09 | 0.00E+00 | nan      |
| 181 | 6/5/2022 0:00        | 9.47E+09 | nan      | 0.00E+00 |
| 182 | *2022-06-14 00:00:00 | 0.00E+00 | nan      | nan      |
| 183 | 6/13/2022 12:00      | nan      | 0.00E+00 | 0.00E+00 |
| 184 | 6/13/2022 6:00       | 2.33E+09 | 0.00E+00 | 0.00E+00 |
| 185 | *2022-06-13 00:00:00 | 2.61E+10 | 0.00E+00 | 0.00E+00 |
| 186 | 6/19/2022 12:00      | 6.64E+09 | 4.15E+08 | 0.00E+00 |
| 187 | 6/19/2022 6:00       | 2.19E+09 | 1.09E+09 | 0.00E+00 |
| 188 | *2022-06-19 00:00:00 | 0.00E+00 | 0.00E+00 | 1.29E+09 |
| 189 | 6/16/2022 12:00      | nan      | nan      | 0.00E+00 |
| 190 | *2022-07-12 06:00:00 | nan      | 1.03E+09 | 0.00E+00 |
| 191 | *2022-07-16 12:00:00 | 1.44E+09 | 7.20E+08 | nan      |
| 192 | 8/9/2022 0:00        | nan      | nan      | 0.00E+00 |
| 193 | 8/8/2022 18:00       | 1.03E+09 | 0.00E+00 | nan      |
| 194 | 8/8/2022 12:00       | 1.26E+09 | nan      | nan      |
| 195 | 8/8/2022 0:00        | 8.08E+08 | nan      | nan      |
| 196 | *2022-08-07 18:00:00 | 2.63E+09 | 0.00E+00 | 0.00E+00 |
| 197 | 8/15/2022 0:00       | 6.70E+08 | 6.82E+08 | 0.00E+00 |
| 198 | *2022-08-20 00:00:00 | 9.96E+08 | 0.00E+00 | nan      |
| 199 | *2022-08-19 18:00:00 | 1.52E+09 | nan      | 0.00E+00 |
| 200 | 8/19/2022 12:00      | nan      | 0.00E+00 | 0.00E+00 |
| 201 | 8/19/2022 0:00       | nan      | nan      | 0.00E+00 |
| 202 | 8/18/2022 18:00      | 8.69E+08 | 4.46E+08 | nan      |
| 203 | 8/18/2022 12:00      | 1.25E+09 | nan      | 0.00E+00 |
| 204 | 8/18/2022 0:00       | 5.91E+08 | 0.00E+00 | nan      |
| 205 | 8/17/2022 18:00      | 2.15E+09 | 0.00E+00 | 0.00E+00 |
| 206 | 8/17/2022 12:00      | 1.62E+09 | nan      | 0.00E+00 |
| 207 | 8/17/2022 6:00       | nan      | nan      | 0.00E+00 |
| 208 | 8/16/2022 18:00      | 2.15E+09 | 0.00E+00 | 0.00E+00 |
| 209 | 8/16/2022 6:00       | 1.46E+09 | 0.00E+00 | nan      |
| 210 | 8/16/2022 0:00       | nan      | 5.41E+08 | 0.00E+00 |
| 211 | 8/15/2022 18:00      | nan      | nan      | 0.00E+00 |
| 212 | 8/26/2022 0:00       | 0.00E+00 | 1.01E+09 | nan      |
| 213 | 9/2/2022 0:00        | 1.40E+09 | 3.68E+08 | 1.86E+08 |
| 214 | 9/1/2022 12:00       | 2.16E+09 | 0.00E+00 | nan      |
| 215 | 8/31/2022 18:00      | nan      | 0.00E+00 | nan      |
| 216 | 8/31/2022 12:00      | 8.52E+08 | 0.00E+00 | nan      |
| 217 | 8/31/2022 6:00       | nan      | nan      | 0.00E+00 |
| 218 | 8/31/2022 0:00       | 0.00E+00 | 0.00E+00 | nan      |
| 219 | 8/29/2022 18:00      | 1.42E+09 | nan      | 0.00E+00 |
| 220 | 9/7/2022 12:00       | 1.12E+09 | nan      | nan      |
| 221 | 9/7/2022 6:00        | 5.56E+08 | 0.00E+00 | nan      |
| 222 | *2022-09-07 00:00:00 | 7.35E+08 | 0.00E+00 | nan      |
| 223 | 9/6/2022 12:00       | 5.87E+08 | 2.11E+08 | 0.00E+00 |
| 224 | 9/6/2022 6:00        | 1.19E+09 | 3.30E+08 | nan      |
| 225 | *2022-09-05 18:00:00 | 1.02E+09 | nan      | nan      |
| 226 | 9/4/2022 12:00       | 1.78E+08 | 1.09E+09 | 1.81E+08 |
| 227 | *2022-09-04 00:00:00 | 1.37E+09 | 1.04E+09 | 0.00E+00 |
| 228 | *2022-09-03 00:00:00 | 1.94E+10 | 0.00E+00 | 0.00E+00 |
| 229 | 9/2/2022 6:00        | 9.00E+08 | 2.29E+08 | nan      |
| 230 | 9/14/2022 0:00       | 7.70E+08 | 3.22E+08 | nan      |

|     |                      |          |          |          |
|-----|----------------------|----------|----------|----------|
| 231 | 9/13/2022 18:00      | 1.14E+09 | 3.29E+08 | nan      |
| 232 | *2022-09-12 12:00:00 | 1.72E+09 | 4.22E+08 | 0.00E+00 |
| 233 | 9/12/2022 0:00       | 2.60E+08 | 7.91E+08 | nan      |
| 234 | 9/11/2022 12:00      | 1.45E+09 | 0.00E+00 | 1.42E+09 |
| 235 | *2022-09-09 06:00:00 | 4.19E+08 | nan      | nan      |
| 236 | *2022-09-09 00:00:00 | 5.96E+08 | 8.63E+08 | 0.00E+00 |
| 237 | *2022-09-08 18:00:00 | nan      | nan      | 0.00E+00 |
| 238 | *2022-09-17 00:00:00 | 1.30E+09 | 2.24E+08 | nan      |
| 239 | *2022-09-16 12:00:00 | 1.25E+09 | 0.00E+00 | 1.42E+08 |
| 240 | 9/16/2022 0:00       | 1.03E+09 | 1.55E+08 | nan      |
| 241 | 9/15/2022 18:00      | 1.37E+09 | 4.27E+08 | nan      |
| 242 | 9/15/2022 12:00      | 1.38E+09 | nan      | 3.84E+07 |
| 243 | 9/15/2022 6:00       | 8.96E+08 | 1.67E+08 | nan      |
| 244 | 9/15/2022 0:00       | 1.04E+09 | 1.76E+08 | nan      |
| 245 | 9/14/2022 18:00      | 1.31E+09 | nan      | nan      |
| 246 | 9/14/2022 6:00       | 1.05E+09 | 2.50E+08 | nan      |
| 247 | 9/25/2022 12:00      | 1.71E+09 | 0.00E+00 | nan      |
| 248 | 9/23/2022 18:00      | 4.30E+08 | 2.19E+08 | nan      |
| 249 | 9/23/2022 12:00      | nan      | 0.00E+00 | nan      |
| 250 | 9/23/2022 6:00       | 2.21E+09 | 8.50E+08 | 0.00E+00 |
| 251 | 9/23/2022 0:00       | nan      | nan      | 0.00E+00 |
| 252 | 9/22/2022 18:00      | 1.20E+09 | 0.00E+00 | nan      |
| 253 | 9/22/2022 12:00      | 2.43E+09 | 0.00E+00 | 0.00E+00 |
| 254 | 9/22/2022 6:00       | nan      | 4.35E+08 | 0.00E+00 |
| 255 | *2022-09-22 00:00:00 | nan      | nan      | 0.00E+00 |
| 256 | 10/2/2022 0:00       | nan      | 2.89E+08 | 0.00E+00 |
| 257 | 9/30/2022 6:00       | 1.44E+09 | 4.28E+08 | nan      |
| 258 | 9/29/2022 18:00      | 1.44E+09 | 3.16E+08 | 1.03E+08 |
| 259 | 9/29/2022 6:00       | 6.00E+08 | 2.08E+08 | nan      |
| 260 | 9/29/2022 0:00       | 1.24E+09 | nan      | nan      |
| 261 | 9/28/2022 18:00      | nan      | 2.03E+08 | 0.00E+00 |
| 262 | 9/28/2022 0:00       | nan      | 5.96E+08 | 0.00E+00 |
| 263 | 9/27/2022 12:00      | nan      | nan      | 0.00E+00 |
| 264 | 9/26/2022 18:00      | 1.54E+09 | nan      | 0.00E+00 |
| 265 | *2022-10-03 00:00:00 | nan      | 1.49E+09 | 0.00E+00 |
| 266 | 10/2/2022 6:00       | 3.55E+09 | nan      | 0.00E+00 |
| 267 | 10/18/2022 18:00     | 1.88E+09 | 7.87E+08 | 0.00E+00 |
| 268 | 10/18/2022 6:00      | 4.69E+09 | 1.75E+08 | 0.00E+00 |
| 269 | 10/17/2022 18:00     | 1.29E+09 | 7.80E+07 | 7.95E+07 |
| 270 | 10/17/2022 0:00      | 1.23E+09 | 8.38E+07 | 0.00E+00 |
| 271 | 10/16/2022 18:00     | 1.28E+09 | 2.54E+08 | 4.47E+07 |
| 272 | *2022-10-16 00:00:00 | nan      | nan      | 0.00E+00 |
| 273 | 10/28/2022 12:00     | 4.23E+09 | 9.32E+08 | 0.00E+00 |
| 274 | 10/28/2022 6:00      | 5.23E+09 | nan      | 0.00E+00 |
| 275 | 10/28/2022 0:00      | 2.98E+09 | 0.00E+00 | 0.00E+00 |
| 276 | *2022-10-27 00:00:00 | 1.29E+09 | nan      | 0.00E+00 |
| 277 | *2022-10-26 18:00:00 | nan      | nan      | 0.00E+00 |
| 278 | 10/26/2022 12:00     | 1.16E+09 | nan      | 0.00E+00 |
| 279 | 10/26/2022 6:00      | 3.18E+09 | 3.70E+08 | 0.00E+00 |
| 280 | 10/26/2022 0:00      | 2.15E+09 | nan      | 0.00E+00 |
| 281 | 10/24/2022 6:00      | nan      | nan      | 0.00E+00 |
| 282 | *2022-11-03 00:00:00 | nan      | nan      | 0.00E+00 |
| 283 | 11/22/2022 0:00      | nan      | nan      | 0.00E+00 |
| 284 | 11/21/2022 12:00     | nan      | nan      | 0.00E+00 |
| 285 | *2022-12-04 00:00:00 | nan      | nan      | 0.00E+00 |
| 286 | *2022-12-03 18:00:00 | nan      | nan      | 0.00E+00 |
| 287 | 12/4/2022 12:00      | nan      | nan      | 0.00E+00 |
| 288 | 12/4/2022 6:00       | nan      | nan      | 0.00E+00 |
| 289 | *2023-02-09 18:00:00 | 9.39E+08 | nan      | nan      |
| 290 | 2/13/2023 6:00       | 6.18E+08 | nan      | nan      |
| 291 | 2/13/2023 0:00       | 1.40E+09 | nan      | nan      |
| 292 | 2/21/2023 12:00      | 1.39E+09 | nan      | nan      |
| 293 | *2023-02-21 06:00:00 | 6.55E+08 | nan      | nan      |
| 294 | 3/1/2023 6:00        | 1.46E+09 | nan      | nan      |
| 295 | 3/3/2023 6:00        | 1.27E+09 | nan      | nan      |
| 296 | 3/2/2023 18:00       | 1.18E+09 | nan      | nan      |
| 297 | 3/2/2023 6:00        | 1.43E+09 | nan      | nan      |
| 298 | 4/29/2023 6:00       | nan      | nan      | 0.00E+00 |
| 299 | 4/28/2023 6:00       | nan      | 1.22E+09 | 0.00E+00 |
| 300 | 4/27/2023 12:00      | nan      | nan      | 0.00E+00 |
| 301 | *2023-05-05 18:00:00 | 8.32E+09 | 0.00E+00 | nan      |
| 302 | 5/1/2023 12:00       | nan      | nan      | 0.00E+00 |
| 303 | 5/7/2023 0:00        | nan      | nan      | 0.00E+00 |
| 304 | 5/6/2023 12:00       | 8.82E+08 | nan      | 0.00E+00 |
| 305 | 6/3/2023 12:00       | nan      | 1.49E+09 | 0.00E+00 |
| 306 | 6/2/2023 6:00        | 4.04E+09 | nan      | 0.00E+00 |
| 307 | 6/10/2023 12:00      | 0.00E+00 | 0.00E+00 | nan      |
| 308 | 6/9/2023 12:00       | nan      | 0.00E+00 | nan      |
| 309 | 6/9/2023 6:00        | nan      | nan      | 0.00E+00 |
| 310 | *2023-07-22 06:00:00 | 0.00E+00 | nan      | nan      |
| 311 | 7/29/2023 18:00      | 1.22E+09 | 3.25E+08 | nan      |
| 312 | 7/29/2023 0:00       | 1.31E+09 | nan      | nan      |
| 313 | 7/28/2023 6:00       | nan      | 2.55E+08 | 0.00E+00 |
| 314 | *2023-08-04 18:00:00 | 2.20E+09 | 0.00E+00 | nan      |
| 315 | 8/9/2023 12:00       | 3.13E+08 | 4.04E+07 | nan      |
| 316 | 8/9/2023 6:00        | 2.44E+08 | 1.52E+07 | nan      |
| 317 | 8/9/2023 0:00        | 5.27E+08 | 1.77E+07 | nan      |
| 318 | 8/8/2023 18:00       | 3.70E+08 | 3.38E+07 | nan      |
| 319 | 8/8/2023 0:00        | 3.38E+08 | nan      | nan      |
| 320 | 8/7/2023 18:00       | 1.37E+09 | nan      | 4.75E+07 |
| 321 | 8/7/2023 6:00        | 7.04E+08 | nan      | nan      |
| 322 | 8/5/2023 6:00        | nan      | nan      | 0.00E+00 |
| 323 | *2023-08-15 00:00:00 | 5.91E+08 | 2.90E+08 | nan      |

|     |                      |          |          |          |
|-----|----------------------|----------|----------|----------|
| 324 | *2023-08-14 18:00:00 | nan      | 3.78E+08 | 0.00E+00 |
| 325 | 8/11/2023 6:00       | nan      | 0.00E+00 | nan      |
| 326 | 8/27/2023 18:00      | nan      | nan      | 0.00E+00 |
| 327 | 8/27/2023 12:00      | 1.16E+09 | 1.47E+08 | nan      |
| 328 | 8/26/2023 12:00      | 4.89E+08 | 6.41E+08 | nan      |
| 329 | 8/26/2023 6:00       | nan      | nan      | 0.00E+00 |
| 330 | 8/25/2023 12:00      | 6.74E+08 | 7.29E+08 | nan      |
| 331 | 8/25/2023 6:00       | nan      | nan      | 0.00E+00 |
| 332 | 9/3/2023 18:00       | 4.40E+09 | nan      | 0.00E+00 |
| 333 | *2023-08-30 12:00:00 | 4.84E+09 | 1.24E+09 | 0.00E+00 |
| 334 | 9/7/2023 12:00       | nan      | 0.00E+00 | 0.00E+00 |
| 335 | 9/7/2023 0:00        | 6.18E+08 | 4.14E+08 | nan      |
| 336 | 9/6/2023 18:00       | nan      | 3.88E+08 | 0.00E+00 |
| 337 | *2023-09-05 12:00:00 | 5.51E+09 | 0.00E+00 | nan      |
| 338 | 9/16/2023 0:00       | 6.60E+08 | 1.65E+08 | 0.00E+00 |
| 339 | 9/15/2023 18:00      | 2.09E+08 | nan      | 0.00E+00 |
| 340 | *2023-09-14 12:00:00 | nan      | nan      | 0.00E+00 |
| 341 | 9/12/2023 0:00       | 6.19E+08 | nan      | nan      |
| 342 | *2023-09-11 12:00:00 | 1.84E+09 | 0.00E+00 | nan      |
| 343 | 9/10/2023 12:00      | 1.42E+09 | 3.61E+08 | nan      |
| 344 | 9/17/2023 6:00       | 1.01E+09 | nan      | nan      |
| 345 | 9/16/2023 18:00      | 1.89E+09 | 0.00E+00 | nan      |
| 346 | 9/16/2023 12:00      | 1.27E+09 | nan      | nan      |
| 347 | 9/16/2023 6:00       | 1.24E+09 | nan      | 0.00E+00 |
| 348 | 11/1/2023 6:00       | 1.07E+09 | 3.03E+08 | nan      |
| 349 | 10/31/2023 6:00      | nan      | nan      | 0.00E+00 |
| 350 | 10/30/2023 0:00      | 1.32E+09 | nan      | nan      |
| 351 | 11/4/2023 6:00       | nan      | nan      | 0.00E+00 |
| 352 | 11/4/2023 0:00       | 2.97E+09 | 0.00E+00 | 0.00E+00 |
| 353 | 12/13/2023 6:00      | nan      | 7.82E+08 | 0.00E+00 |
| 354 | 12/13/2023 0:00      | nan      | nan      | 0.00E+00 |
| 355 | 12/12/2023 0:00      | 5.18E+09 | 0.00E+00 | nan      |
| 356 | 12/11/2023 18:00     | 6.16E+09 | 0.00E+00 | nan      |
| 357 | 12/11/2023 12:00     | nan      | 0.00E+00 | nan      |
| 358 | 12/21/2023 6:00      | 8.99E+09 | 1.68E+09 | 0.00E+00 |
| 359 | *2023-12-26 06:00:00 | 5.05E+09 | 6.66E+08 | 0.00E+00 |
| 360 | 12/24/2023 18:00     | 1.08E+09 | 9.46E+07 | nan      |
| 361 | 12/24/2023 6:00      | 4.39E+09 | 2.07E+08 | 0.00E+00 |
| 362 | 12/31/2023 12:00     | 4.40E+09 | 0.00E+00 | nan      |
| 363 | 12/31/2023 6:00      | nan      | nan      | 0.00E+00 |
| 364 | 12/31/2023 0:00      | 6.40E+09 | 0.00E+00 | 0.00E+00 |

## REFERENCES:

- 230 DeMott, P. J., Hill, T. C., McCluskey, C. S., Prather, K. A., Collins, D. B., Sullivan, R. C., Ruppel, M. J., Mason, R. H., Irish, V. E., Lee, T., Hwang, C. Y., Rhee, T. S., Snider, J. R., McMeeking, G. R., Dhaniyala, S., Lewis, E. R., Wentzell, J. J., Abbatt, J., Lee, C., Sultana, C. M., Ault, A. P., Axson, J. L., Diaz Martinez, M., Venero, I., Santos-Figueroa, G., Stokes, M. D., Deane, G. B., Mayol-Bracero, O. L., Grassian, V. H., Bertram, T. H., Bertram, A. K., Moffett, B. F., and Franc, G. D.: Sea spray aerosol as a unique source of ice nucleating particles, *P. Natl. Acad. Sci. USA*, 113, 5797–5803, <https://doi.org/10.1073/pnas.1514034112>, 2016.
- 235 Krishnamoorthy, K. and Lee, M.: New approximate confidence intervals for the difference between two Poisson means and comparison, *Journal of Statistical Computation and Simulation*, 83, 2232–2243, <https://doi.org/10.1080/00949655.2012.686616>, 2013.
- 240 Li, G., Wieder, J., Pasquier, J. T., Henneberger, J., and Kanji, Z. A.: Predicting atmospheric background number concentration of ice-nucleating particles in the Arctic, *Atmos. Chem. Phys.*, 22, 14441–14454, <https://doi.org/10.5194/acp-22-14441-2022>, 2022.
- 245 Moore, K. A.: Constraining marine ice nucleating particle parameterizations in atmospheric models using observations from the Southern Ocean, M.S. Thesis, Colorado State University, Ft. Collins, CO, available at <https://mountainscholar.org/handle/10217/208435?show=full> [last visited on October 17, 2024], 2020.
- 250 Möhler, O., Adams, M., Lacher, L., Vogel, F., Nadolny, J., Ullrich, R., Boffo, C., Pfeuffer, T., Hobl, A., Weiß, M., Vepuri, H. S. K., Hiranuma, N., and Murray, B. J.: The Portable Ice Nucleation Experiment (PINE): a new online instrument for laboratory studies and automated long-term field observations of ice-nucleating particles, *Atmos. Meas. Tech.*, 14, 1143–1166, <https://doi.org/10.5194/amt-14-1143-2021>, 2021.
- 255 Sorribas, M., Andrews, E., Ogren, J. A., del Aguila, A., Fraile, R., Sheridan, P., and Yela, M.: Climatological study for understanding the aerosol radiative effects at southwest Atlantic coast of Europe, *Atmos. Environ.*, 205, 52–66, <https://doi.org/10.1016/j.atmosenv.2019.02.017>, 2019.
- 260 Sorribas, M., de la Morena, B. A., Wehner, B., López, J. F., Prats, N., Mogo, S., Wiedensohler, A., and Cachorro, V. E.: On the sub-micron aerosol size distribution in a coastal-rural site at El Arenosillo Station (SW – Spain), *Atmos. Chem. Phys.*, 11, 11185–11206, <https://doi.org/10.5194/acp-11-11185-2011>, 2011.
- 265 Testa, B., Hill, T. C. J., Marsden, N. A., Barry, K. R., Hume, C. C., Bian, Q., et al.: Ice nucleating particle connections to regional Argentinian land surface emissions and weather during the Cloud, Aerosol, and Complex Terrain Interactions experiment, *Journal of Geophysical Research: Atmospheres*, 126, e2021JD035186. <https://doi.org/10.1029/2021JD035186>, 2021.
- 270 Wilbourn, E. K., Lacher, L., Guerrero, C., Vepuri, H. S. K., Höhler, K., Nadolny, J., Pantoya, A. D., Möhler, O., and Hiranuma, N.: Measurement report: A comparison of ground-level ice-nucleating-particle abundance and aerosol properties during autumn at contrasting marine and terrestrial locations, *Atmos. Chem. Phys.*, 24, 5433–5456, <https://doi.org/10.5194/acp-24-5433-2024>, 2024.
